RESEARCH ARTICLE

# The Arabidopsis SUMO E3 ligase SIZ1 mediates the temperature dependent trade-off between plant immunity and growth

Valentin Hammoudi<sup>1</sup>, Like Fokkens<sup>1</sup>, Bas Beerens<sup>1</sup>, Georgios Vlachakis<sup>1<sup>aa</sup></sup>, Sayantani Chatterjee<sup>1</sup>, Manuel Arroyo-Mateos<sup>1</sup>, Paul F. K. Wackers<sup>2<sup>ab</sup></sup>, Martijs J. Jonker<sup>2</sup>, Harrold A. van den Burg<sup>1\*</sup>

**1** Molecular Plant Pathology, University of Amsterdam, Amsterdam, The Netherlands, **2** RNA Biology and Applied Bioinformatics, University of Amsterdam, Amsterdam, The Netherlands

<sup>aa</sup> Current address: ENZA seeds, Enkhuizen, the Netherlands

<sup>ab</sup> Current address: National Institute for Public Health and the Environment, BA Bilthoven, The Netherlands

\* [h.a.vandenburg@uva.nl](mailto:h.a.vandenburg@uva.nl)

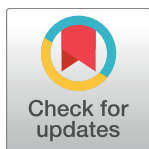

**OPEN ACCESS**

**Citation:** Hammoudi V, Fokkens L, Beerens B, Vlachakis G, Chatterjee S, Arroyo-Mateos M, et al. (2018) The Arabidopsis SUMO E3 ligase SIZ1 mediates the temperature dependent trade-off between plant immunity and growth. *PLoS Genet* 14(1): e1007157. <https://doi.org/10.1371/journal.pgen.1007157>

**Editor:** Marcel Quint, Martin-Luther-University Halle-Wittenberg, GERMANY

**Received:** April 25, 2017

**Accepted:** December 14, 2017

**Published:** January 22, 2018

**Copyright:** © 2018 Hammoudi et al. This is an open access article distributed under the terms of the [Creative Commons Attribution License](https://creativecommons.org/licenses/by/4.0/), which permits unrestricted use, distribution, and reproduction in any medium, provided the original author and source are credited.

**Data Availability Statement:** All relevant data are within the paper and its Supporting Information files, except for the the microarray data, which were deposited in Gene Expression Omnibus (GEO, <http://www.ncbi.nlm.nih.gov/geo/>) under the accession number GSE97641 and Github ([https://github.com/LikeFokkens/Siz1\\_immunity-vs-growth\\_temperature](https://github.com/LikeFokkens/Siz1_immunity-vs-growth_temperature)).

**Funding:** This work was supported by Vernieuwingsimpuls VID1 grant (864.10.004) from

## Abstract

Increased ambient temperature is inhibitory to plant immunity including auto-immunity. SNC1-dependent auto-immunity is, for example, fully suppressed at 28°C. We found that the Arabidopsis sumoylation mutant *siz1* displays SNC1-dependent auto-immunity at 22°C but also at 28°C, which was EDS1 dependent at both temperatures. This *siz1* auto-immune phenotype provided enhanced resistance to *Pseudomonas* at both temperatures. Moreover, the rosette size of *siz1* recovered only weakly at 28°C, while this temperature fully rescues the growth defects of other SNC1-dependent auto-immune mutants. This thermosensitivity of *siz1* correlated with a compromised thermosensory growth response, which was independent of the immune regulators PAD4 or SNC1. Our data reveal that this high temperature induced growth response strongly depends on COP1, while SIZ1 controls the amplitude of this growth response. This latter notion is supported by transcriptomics data, *i.e.* SIZ1 controls the amplitude and timing of high temperature transcriptional changes including a subset of the PIF4/BZR1 gene targets. Combined our data signify that SIZ1 suppresses an SNC1-dependent resistance response at both normal and high temperatures. At the same time, SIZ1 amplifies the dark and high temperature growth response, likely via COP1 and upstream of gene regulation by PIF4 and BRZ1.

## Author summary

Ambient temperature is a major actor in plant immunity and in growth regulation. Foremost, high temperature (>27°C) is known to block plant defence responses. High temperature also alters the plant morphology by inducing elongation growth, which facilitates plant ‘cooling’. This process is called thermomorphogenesis. Importantly, the SUMO E3 ligase SIZ1 suppresses plant immunity at normal conditions (22°C), but its role in immunity at high temperature was unknown. SIZ1 was recently shown to sumoylate and activate the ubiquitin E3 ligase COP1, a key player in thermomorphogenesis affecting the

the Netherlands Scientific Organisation (NWO) awarded to HAvdB and VH and the Dutch Topsector program Horticulture and Starting Materials (HAvdB, SC, MAM). The funders had no role in study design, data collection and analysis, decision to publish, or preparation of the manuscript.

**Competing interests:** The authors have declared that no competing interests exist.

accumulation and/or stability of key transcription factors for this process (PIF4 and HY5). At high temperature PIF4 suppresses SNC1-dependent growth defects and auto-immunity for the *snc1-1* mutant. We report that part of the SNC1-dependent auto-immune response is retained and activated in the *siz1* mutant at high temperature resulting in enhanced resistance to *Pseudomonas*. In addition, we find that SIZ1 controls the thermomorphogenesis response and it affects expression of a substantial subset of PIF4 and BZR1 gene targets in response to high temperature. Our data imply that SIZ1 acts upstream of the PIF4/BZR1 hub. Combined the data highlight that SIZ1 has a dual role in the trade-off between SNC1-dependent immunity and growth at elevated temperature, where the latter aspect potentially runs via COPI.

## Introduction

Ambient temperature is a major factor that affects plant growth and development, but also plant immunity [1,2]. In particular, the temperature range of 16–32°C modulates the output of many plant immune receptors. For example, the tobacco *N* (*Necrosis*) gene fails to trigger resistance against Tobacco mosaic virus (TMV) at 30°C, while conferring resistance at 23°C [3]. This is accompanied by the loss of the hypersensitive response (HR) above 27°C. This HR includes a localized cell death that appears to be associated with recognition of pathogen effectors resulting in effector-triggered immunity (ETI) [4–7]. Multiple examples of high temperature suppression of ETI have been described for the TNL-type of immune receptors (Toll Interleukin-1 receptor [TIR], NB-LRR-type) [2], including the tobacco immune receptor *N* against Tobacco mosaic virus (TMV) [7,8], but also resistance mediated by the Arabidopsis immune receptor RPS4, which recognizes the avirulence protein AvrRPS4 from *Pseudomonas*, is suppressed at high temperature [9]. Finally, SNC1 (Suppressor of *npr1-1*, constitutive 1) dependent auto-immunity in the gain-of-function mutant *snc1-1* is suppressed at high temperature [10]. Auto-immunity in the *snc1-1* mutant was caused by hyperaccumulation of a mutant variant of SNC1 resulting in a dwarf stature of the mutant plant with curly leaves at 22°C [11]; At 28°C this auto-immune phenotype of *snc1-1* is fully suppressed yielding plants with wild type rosettes without any macroscopic lesions or microscopic cell death. Importantly, HR activation by SNC1 required nuclear localization of SNC1, which appeared to be compromised when plants were kept at 28°C [6,7,12].

In non-infected plants, SNC1 levels are tightly controlled at both the transcript and protein level to prevent spurious immune signalling [13]. The expression of *SNC1* is, for example, indirectly negatively regulated by the plasma membrane-localized protein BON1 (Bonzai 1) [14], but also the protein levels of SNC1 are regulated *e.g.* by the immune adaptor SRFR1 (Suppressor of RPS4-RLD 1) [15,16], several protein folding chaperones [17], and the F-box protein CPR1 (Constitutive expressor of Pathogenesis-related (PR) proteins 1) [11,18]. Mutations in the corresponding genes (*e.g.* *snc1-1*, *bon1*, *srfr1-4* and *cpr1-2*) cause SNC1-dependent auto-immunity (hereafter SNC1<sup>auto-1</sup>). SNC1<sup>auto-1</sup> relies on EDS1 and PAD4 (Enhanced disease susceptibility 1, Phytoalexin-deficient 4) [19]. Upon recognition of biotrophic pathogens, EDS1 translocates from the cytoplasm, where it is sequestered by the related protein PAD4, to the nucleus [20–23]. Nuclear localization of EDS1 is necessary for transcriptional reprogramming to trigger SA biosynthesis and other plant defence responses.

Strikingly, high temperature suppression of auto-immunity depends for the *snc1-1* mutant on the central growth regulator PIF4 (Phytochrome Interacting Factor 4), a transcription factor (TF) that is essential for thermomorphogenesis at 28°C [24]. This implies that plant growth

is prioritized over SNC1-dependent auto-immunity at 28°C via transcriptional regulation. High ambient temperature increases PIF4 activity by controlling both its transcript levels and protein levels in a diurnal dark/light cycle [25]. This process is directly affected by relocalization of the ubiquitin E3 ligase COP1 (Constitutive Photomorphogenesis 1) to the nucleus in dark conditions. In the nucleus COP1 targets key regulators of both PIF4 protein activity and *PIF4* gene expression for degradation [26]. Recent data highlight that COP1 is not only essential for the dark-induced growth response, but also at high ambient temperature in a normal diurnal dark/light cycle [27].

Here we studied auto-immunity in a mutant of the Arabidopsis SUMO E3 ligase SIZ1. Auto-immunity of *siz1* highly resembles SNC1<sup>auto-1</sup> [28,29], *i.e.* the mutant shows enhanced resistance to *Pseudomonas* infection due to high levels of SA, its rosette adopts a very similar morphology (including lesions and spontaneous cell death) as the SNC1<sup>auto-1</sup> mutants, and this auto-immune phenotype depends on *PAD4*. Auto-immunity in the *siz1* mutant is likely caused by the absence of sumoylation on one or more of its substrates, as the *sumo1/2<sup>KD</sup>* knock-down mutant also displays auto-immunity [29]. SIZ1 is the major SUMO E3 ligase in Arabidopsis [30], affecting SUMO conjugation of many substrates including pivotal regulators of growth [31–33]. For example, COP1 is a direct substrate of SIZ1 and its sumoylation enhances the intrinsic ubiquitin E3 ligase activity of COP1 [34,35].

As PIF4 controls the high temperature-mediated recovery of *snc1-1* auto-immunity and SIZ1 controls the activity of a key regulator of PIF4, namely COP1, we assessed here (i) whether the *siz1* auto-immune phenotype requires a functional *SNC1* gene copy at normal and high temperature. Moreover, we tested (ii) if loss of SIZ1 function suppresses the COP1/PIF4 mediated growth response at high temperature and in dark conditions. We found that *siz1* auto-immunity is sustained at 28°C resulting in enhanced resistance to bacteria, which depended on both SNC1 and EDS1. The dwarf stature of *siz1* also hardly recovered at 28°C. Moreover, we found that *siz1* shows a compromised thermosensory growth response, which was independent of SNC1 and *PAD4*. This positive regulatory role of SIZ1 in growth regulation was suppressed by the TF HY5 (Elongated hypocotyl 5) at 22°C, while it depended on COP1 function at 28°C (and in dark conditions). HY5 is a direct substrate for COP1 targeted protein degradation. Finally, we found that high temperature induced transcriptome changes are both attenuated and delayed in the *siz1* and *sumo1/2<sup>KD</sup>* mutants and that a substantial subset of the affected genes are known genomic targets for PIF4 binding and regulation.

## Results

### Hallmarks of auto-immunity are not fully suppressed at high temperature in *siz1*

A hallmark of SNC1<sup>auto-1</sup> is a dwarf stature and curled leaves. These morphological defects disappear when SNC1<sup>auto-1</sup> mutants like *cpr1-2*, *bon1*, *snc1-1*, and *srfr1-4* are grown at 28°C, adopting a wild type stature (Fig 1A and 1B). Here we tested if also for *siz1* these morphological defects are rescued when it grows at high temperature. In contrast to the four aforementioned SNC1<sup>auto-1</sup> mutants, we observed that *siz1* remains significantly smaller than the wild type control at 28°C (Fig 1A and Fig 1B, compare group 'cd' with group b). At 22°C, the rosette weight of *siz1* was indistinguishable from these four SNC1<sup>auto-1</sup> mutants (Fig 1B, group 'd'). Previous work by others had shown that the auto-immune phenotype of these SNC1<sup>auto-1</sup> mutants depends on (i) a functional gene copy of *PAD4* and *EDS1*, and (ii) accumulation of the defence hormone SA [10,16,36,37]. Likewise, Lee and co-workers demonstrated that the *siz1* phenotype (partially) depends on *PAD4* and SA accumulation [28], but the role of *EDS1* remained unknown. Since *EDS1* is the major nuclear actor of the *PAD4/EDS1* hub [22,38]

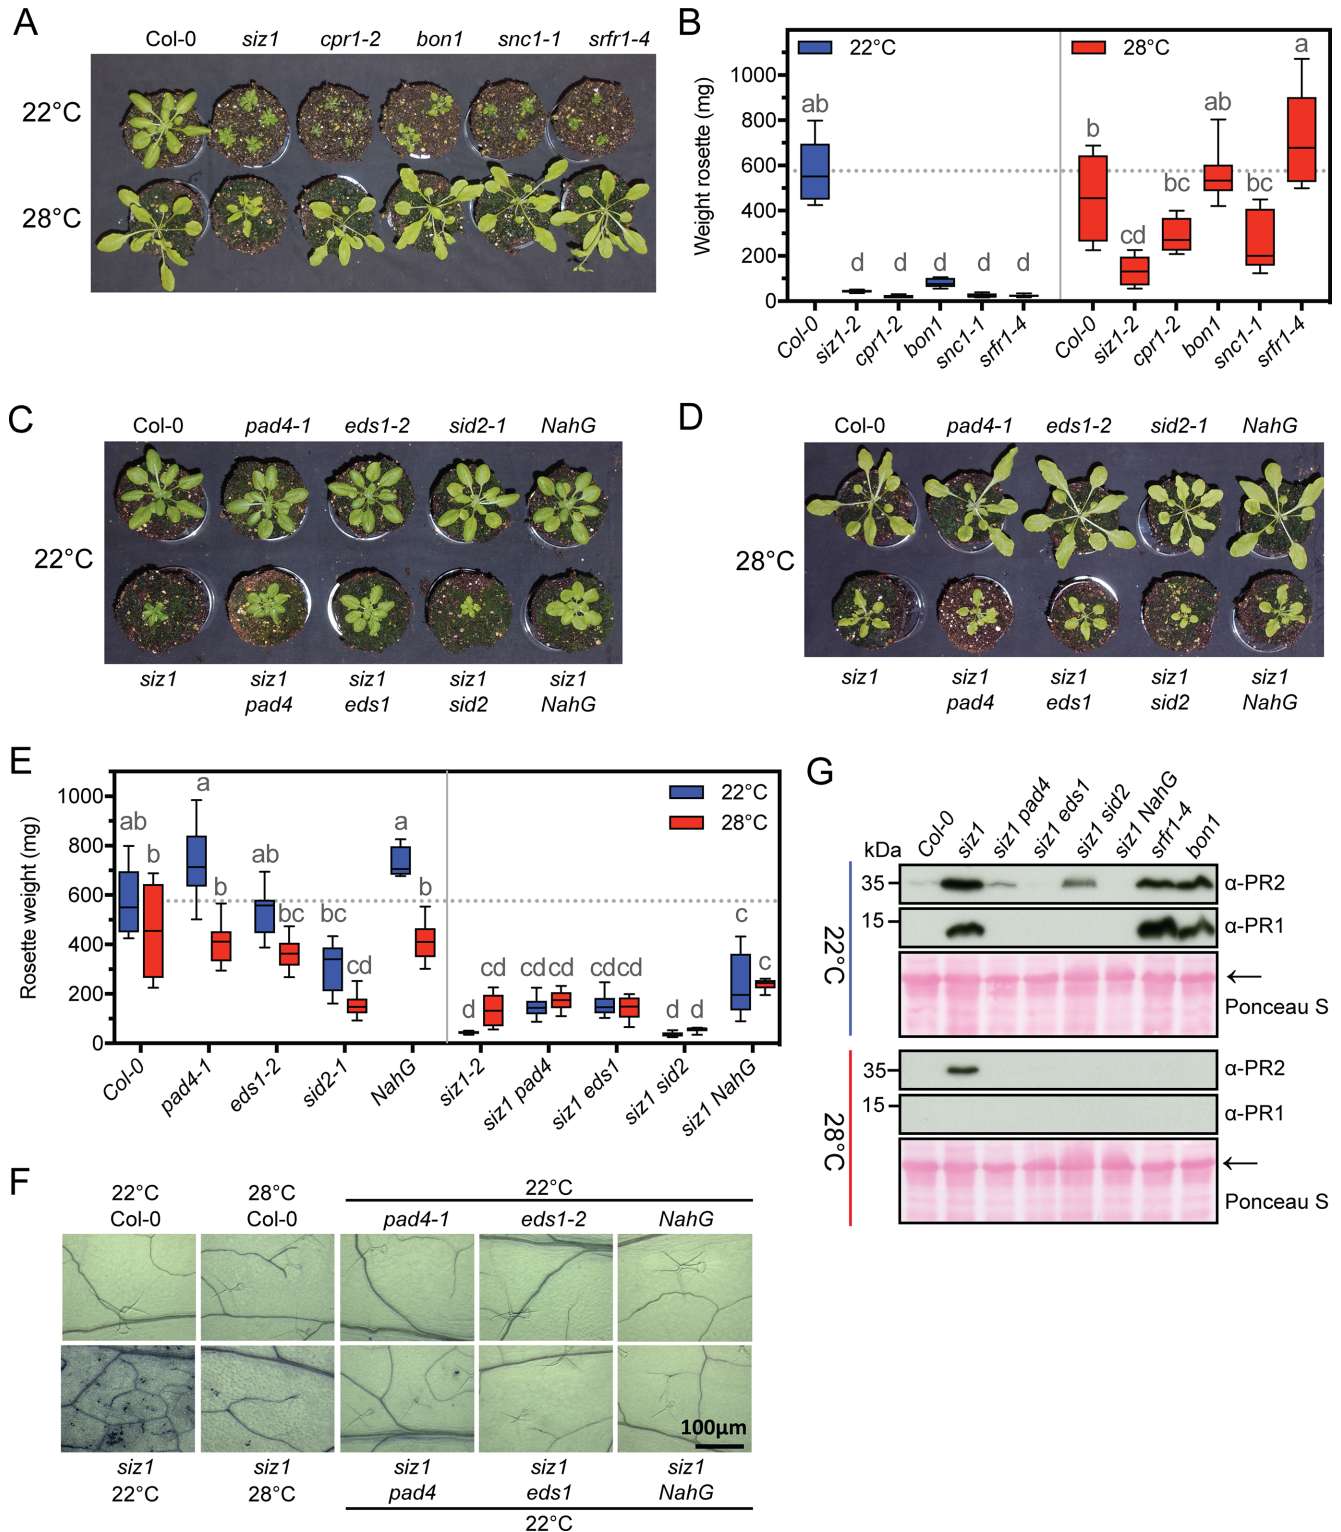

**Fig 1. While growth retardation of *siz1* is hardly rescued at 28°C, other hallmarks of auto-immunity fully recover at this temperature.** (A) Picture of the rosettes of *siz1* and SNC1-dependent auto-immune mutants (*cpr1-2*, *bon1*, *snc1-1*, *srfr1-4*) grown for 5 weeks in SD conditions at 22°C or 28°C. The mutants are in the Col-0 background. (B) Box-plot (middle bar = median, box limit = upper and lower quartile, extremes = Min and Max values) depicting the rosette weight of the genotypes shown in (A). Plants were 5-week-old plants. Significant differences were detected using a two-way ANOVA with Tukey's multiple comparisons test: Genotype  $p$ -value < 0.0001 (29% of the variation), Temperature  $p$ -value < 0.001 (37%); GxT interaction  $p$ -value < 0.0001 (22%); letters indicate significantly different post hoc groups (n = 8–10). The experiment was repeated 3 times with similar result. (C, D) Similar to (A), plants were

grown in parallel for 5-weeks at 22°C or 28°C. The top row depicts wild type Col-0 and the single mutants, while the bottom row depicts *siz1* and *siz1* crossed with the mutants of the top row. (E) Box-plot with the rosette weight of the plants of panels (C, D). The statistical test was similar to (B) with similar result ( $n = 8$ ). *siz pad4-1*, *siz1 eds1-2*, and *siz1 NahG* show a small recovery at 22°C (C) without any additional effect at 28°C (D). The experiment was repeated three times with similar result. Left side, single mutants; right side, *siz1* and the corresponding double mutants. (F) Spontaneous cell death is absent in *siz1* at 28°C, but also 22°C when *EDS1/PAD4* are mutated or SA accumulation is compromised (*NahG*). Fully elongated leaves of 5-week-old plants were stained with Trypan blue and examined under the microscope. (G) Accumulation of PR1/PR2 in *siz1* double mutants grown at 22°C or 28°C. *srfr1* and *bon1* are shown as control for PR accumulation. Total protein was extracted from 5-week-old plants. PR proteins were detected with polyclonal antibodies. Blots were stained with Ponceau S to confirm equal protein loading (← = Rubisco). The blots shown are a single exposure on one film of gels run/blotted in parallel with the samples taken in parallel as well. The apparent Mw of marker proteins is shown on the left.

<https://doi.org/10.1371/journal.pgen.1007157.g001>

and SIZ1 is considered to primarily act in the nucleus [39], we examined if *siz1* auto-immunity depends on EDS1. The *siz1* growth defect partially recovered when it was crossed with the *eds1-2* mutation in the Col-0 background, but this recovery did not significantly differ from the recovery seen for the double mutants *siz1 pad4* and *siz1 NahG* (a transgene encoding salicylate hydroxylase that effectively prevents SA accumulation by converting it to catechol) at 22°C (Fig 1C and 1E; all post hoc group 'c'). We also crossed *siz1* with a mutant for *SID2* (*Salicylic acid induction deficient 2*), which encodes the key enzyme for SA synthesis in plant immunity [40]. As seen by others for other auto-immune mutants [41], introduction of the *sid2* mutation did not rescue the *siz1* growth defect seen at 22°C (Fig 1C and 1E, group d). Importantly, at 28°C none of the *siz1* double mutants showed any additional growth recovery compared to *siz1* alone (Fig 1D and 1E, group c). This suggests that the small growth recovery of *siz1* seen at 28°C (Fig 1E, from only 'd' at 22°C to 'cd' at 28°C) is potentially linked to suppression of its auto-immune phenotype, which in turn would depend on EDS1/PAD4 and SA accumulation.

Hence, we assessed if other hallmarks of the  $SNC1^{\text{auto-I}}$  phenotype are also partially rescued when *siz1* is grown at 28°C. We looked at spontaneous cell death, expression of defence-related genes (*PR1*, *PR2*, and *SNC1*), and accumulation of the encoded PR proteins. Both spontaneous cell death and *PR1* expression are known (i) to strongly depend on EDS1/PAD4 and SA accumulation, and (ii) to be suppressed at 28°C in the aforementioned  $SNC1^{\text{auto-I}}$  mutants. Spontaneous cell death was fully suppressed when *siz1* was grown at 28°C (Fig 1F). At 22°C spontaneous cell death was lost in the double mutants *siz1 pad4*, *siz1 eds1* and *siz1 NahG* (Fig 1F), indicating that EDS1/PAD4 and SA accumulation are required for the spontaneous cell death in *siz1*. At 22°C expression of *PR1* and *PR2* was also strongly up-regulated in *siz1* compared to the control (Col-0) and expression of both genes required EDS1, PAD4 and SA accumulation (Figs 2E, S1A and S1B). At 28°C, *PR1* expression was completely suppressed in *siz1*, but *PR2* expression partially remained (S1B Fig). This situation was reflected in their protein levels, i.e. *PR1* levels were high in *siz1* at 22°C while undetectable at 28°C (Fig 1G). In contrast, *PR2* levels were elevated in *siz1* both at 22°C and 28°C albeit to a lower level at 28°C. In the case of the four  $SNC1^{\text{auto-I}}$  mutants, *PR1* and *PR2* did not accumulate when these mutants were grown at 28°C (Figs 1G and 2D). Thus, the *siz1* auto-immune response is (partially) temperature sensitive, but it does not simply mimic the 'classic' behaviour of  $SNC1^{\text{auto-I}}$  mutants.

### Spontaneous cell death but not accumulation of PR2 depends in *siz1* on *SNC1*

As elevated expression of *SNC1* triggers auto-immunity at 22°C [42], we measured *SNC1* expression in *siz1*. *SNC1* expression proved to be induced by nearly 5-fold in *siz1* at 22°C (S1C Fig), suggesting that an increase in *SNC1* transcript levels could be causal for the *siz1* dwarf stature and auto-immunity. To determine if the *SNC1* gene is indeed required for the *siz1* phenotype at 22°C/28°C, we crossed *siz1* with a loss-of-function mutant of *SNC1*, *snc1-11*

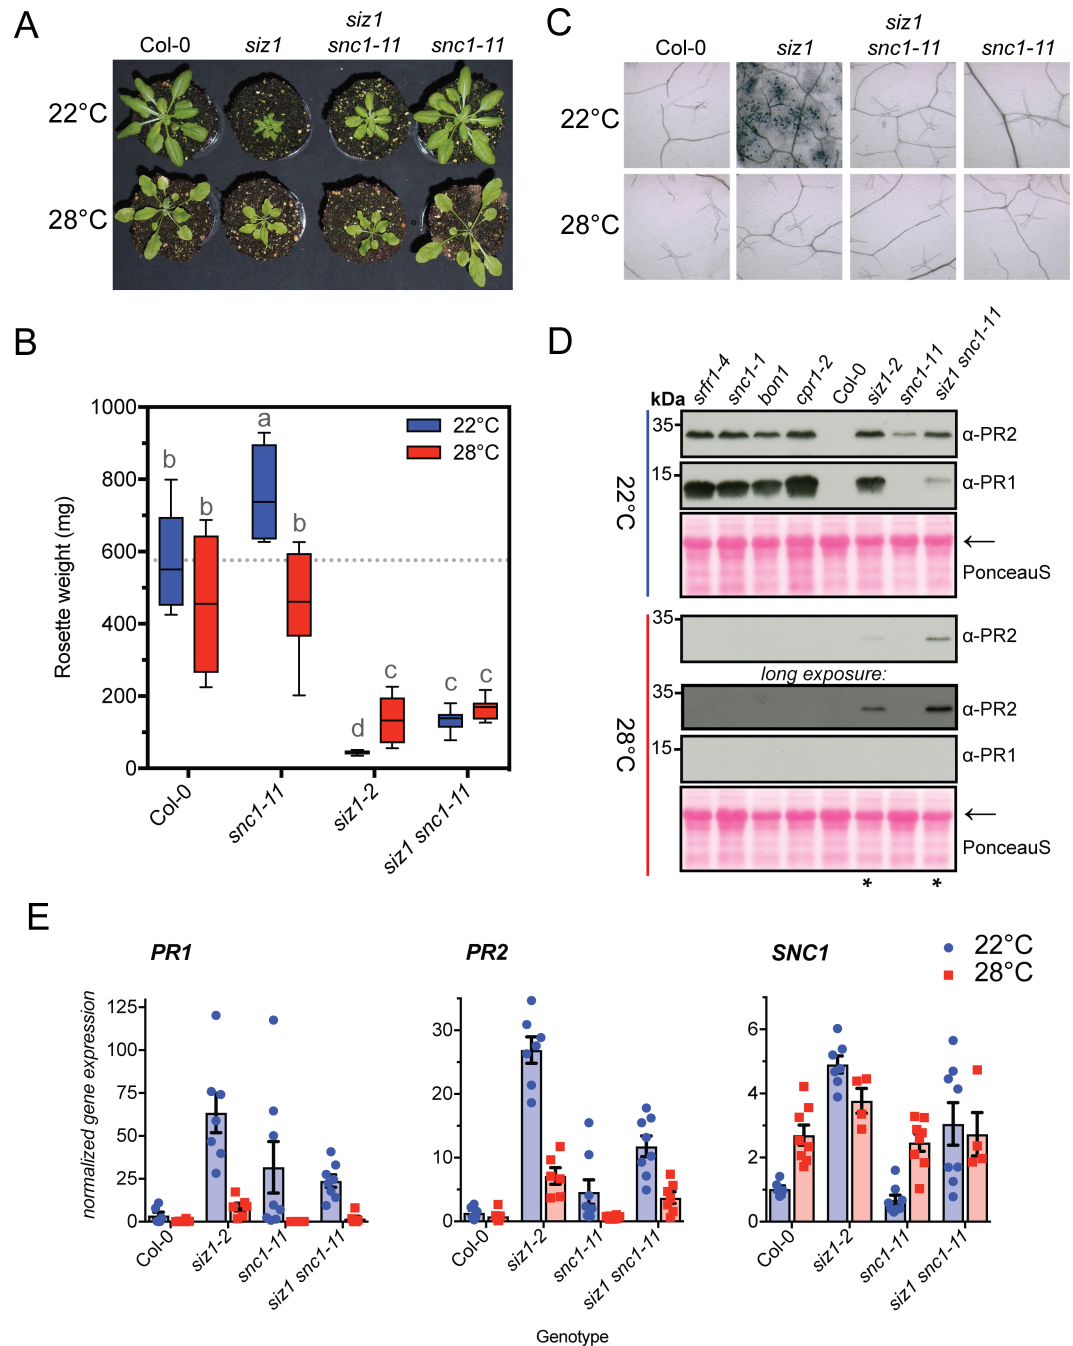

**Fig 2. The *siz1* auto-immune phenotype is partially rescued by loss of *SNC1*.** (A) Picture of the rosettes of *siz1* and the *siz1 snc1-11* double at 22°C/28°C. At 22°C growth retardation of *siz1* is partially recovered in the *snc1-11* background, while at 28°C *siz1 snc1-11* does not show any additional recovery to *siz1*. Plants were 5-weeks-old (SD). (B) Box plot showing the rosette weight of the plants in (A). Significant differences were determined using a two-way ANOVA followed by a Tukey post-hoc test: Genotype *p*-value < 0.0001 (75% of the variation), Temperature *p*-value = 0.0033 (2.1%); GxT interaction *p*-value < 0.0001 (8.8%). The letters indicate statistically different post hoc groups (n = 8) (C) Spontaneous cell death in *siz1* requires *SNC1* function. Fully elongated leaves of 5-week-old plants were stained with Trypan blue. (D) Accumulation of PR1 and PR2 is partially suppressed in *siz1 snc1-11*. As control for thermosensitive accumulation of PR proteins, *srf1-4*, *snc1-1*, *bon1* and *cpr1-2* are shown. Total protein was extracted from 5-week-old plants. The blots were prepared in parallel and ECL detection was done on one film, except for the 'long exposure' to reveal PR2 accumulation. Blots were stained with Ponceau S to confirm equal protein loading. Asterisks mark enhanced PR2 accumulation in *siz1-2* and *siz1 snc1-11* at 28°C. (E) Normalized gene expression of *PR1*, *PR2* and *SNC1* (mean ± SE) in 5-week-old plants (fold change; Col-0 at 22°C = 1). *PR1* and *PR2* expression are still elevated in *siz1 snc1-11* at 22°C. At 28°C *PR1* expression is gone in *siz1 snc1-11*, while *PR2* expression remains up regulated (7-fold up).

<https://doi.org/10.1371/journal.pgen.1007157.g002>

(SALK\_04705). This mutant has a T-DNA insertion in the first exon, which results in a severely truncated transcript [42]. When grown at 22°C, the *siz1 sncl-11* double mutant displayed a small but significant growth recovery compared to *siz1* (Fig 2A and 2B; group 'c' and 'd', respectively), which is more apparent when the plants are flowering (S2 Fig). However, in our conditions the *sncl-11* mutant itself also displayed a small but significant increase in biomass compared to the wild type control (Col-0) at 22°C (Fig 2B). More importantly, both *siz1* and the *siz1 sncl-11* double mutant largely kept their dwarf stature when grown at 28°C. This is striking, as the growth defects of the SNC1<sup>auto-1</sup> mutants *cpr1-2*, *bon1* and *srfr1-4* recovered strongly (to wild type levels) when the *sncl-11* mutation was introduced in these mutants by crossing [10,15,18]. The increase in SNC1 transcript levels can, therefore, not be the main or sole cause of the dwarf stature of *siz1*.

Nonetheless, spontaneous cell death was fully suppressed in *siz1 sncl-11* at 22°C (Fig 2C), while PR2 and to a lesser extent PR1 still accumulated in *siz1 sncl-11* at 22°C (Fig 2D). Also at 28°C PR2 still accumulated to some extent in *siz1 sncl-11*, similar to *siz1* (Fig 2D). The PR1 and PR2 protein levels were again mirrored by their gene expression levels (Fig 2E), i.e. at 22°C the expression of *PR1* was roughly 50% in *siz1 sncl-11* in comparison to *siz1*, which in both cases was fully suppressed when these two mutants were grown at 28°C. On the other hand, *PR2* expression remained detectable when both mutants were grown at 28°C. Also the (truncated) transcript of *SNC1* still accumulated to higher levels in *siz1 sncl-11* than in *siz1*. For *sncl-11*, 2–3 samples showed up-regulation of *PR1* and *PR2*, while the remaining samples 5 samples showed hardly any up-regulation suggesting that the latter samples reflect the general trend.

Increased SNC1 protein levels are known to trigger auto-immunity [11]. SNC1 levels are negatively controlled by the HSP90/SGT1/SRFR1 chaperone-complex of which some components were reported to be SUMO substrates [43,44]. We therefore examined whether *siz1* auto-immunity was attenuated when mutants for SGT1a, SGT1b, and RAR1 were introduced by crossing. Introduction of these mutants in *siz1* (i.e. *siz1 rar1*, *siz1 sgt1a<sup>KO</sup>* and *siz1 sgt1b<sup>eta3</sup>*) partially compromised cell death induction (S3A Fig), while it hardly enhanced rosette growth in these *siz1* chaperone double mutants (S3B Fig). Hence, the chaperones contribute to the *siz1* phenotype, but they are not essential for spontaneous cell death. Clearly, the *siz1* auto-immune phenotype partially depends on SNC1, but not all of the elements of the auto-immune phenotype disappear when SNC1 is non-functional.

### SIZ1 auto-immunity confers resistance to *Pseudomonas* at high temperature in an EDS1- and SNC1-dependent manner

As the PR1 levels were down in *siz1* at 28°C, we tested if enhanced resistance of *siz1* to the pathogen *Pseudomonas syringae* pv. *syringae* strain DC3000 (PstDC3000) is compromised at high temperature. In order to inoculate similar looking plants, all plants were grown at 28°C and half of the plants was shifted to 22°C twenty-four hours prior to the inoculation. In this way extreme differences in rosette size, morphology, or tissue structure had no impact on the disease assay (compare the plants grown at 28°C in Fig 1A). The 24 hours pre-incubation at 22°C was sufficient to re-activate auto-immunity in the SNC1<sup>auto-1</sup> mutants tested (*cpr1-2*, *bon1*, *sncl-11*) resulting in reduced susceptibility to PstDC3000 (Fig 3A, post hoc groups 'cd' and 'd'). As expected, the three tested SNC1<sup>auto-1</sup> mutants (*cpr1-2*, *bon1*, and *sncl-11*) were as susceptible as the wild type control (Col-0) at 28°C (Fig 3B). However, *siz1* displayed enhanced resistance to PstDC3000 both at 22°C and 28°C (Fig 3A and 3B). This resistance was compromised in *siz1* at 22°C when PAD4, EDS1 or SNC1 were mutated (Fig 3A). At high temperature, only *siz1 pad4* retained enhanced resistance to PstDC3000, while *siz1 eds1-2* and

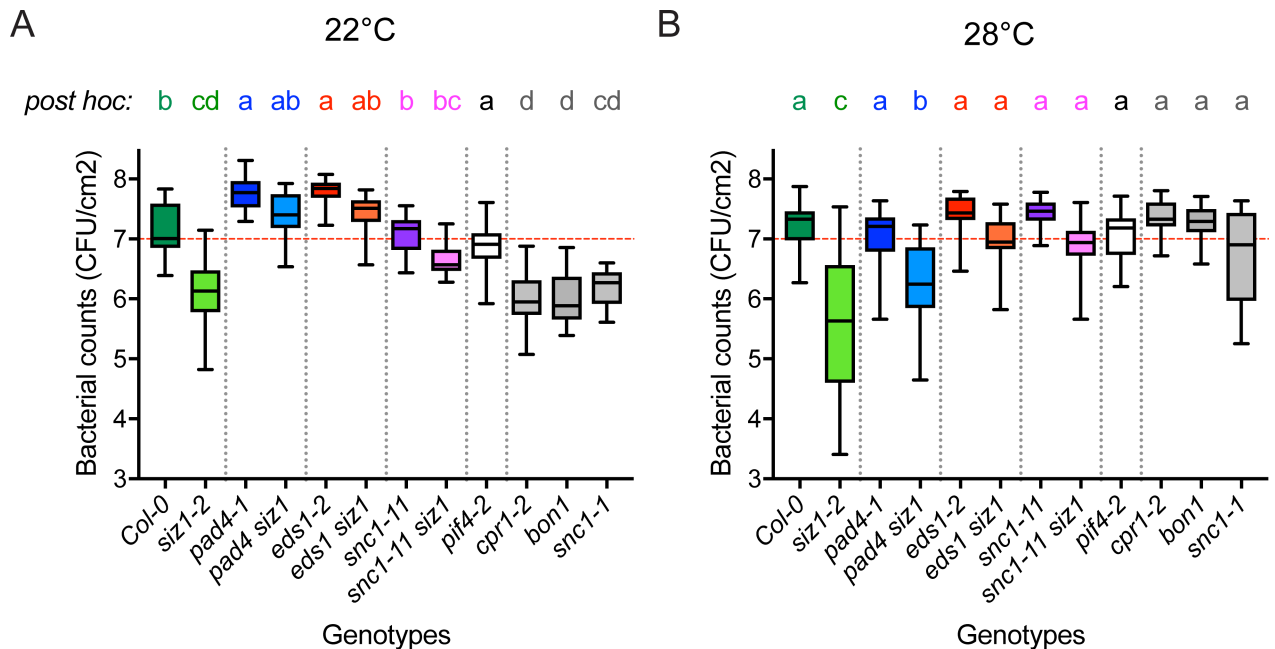

**Fig 3. *siz1* displays enhanced resistance to *Pseudomonas* at 22°C and 28°C in a SNC1- and EDS1-dependent manner.** (A) Disease resistance to *Pseudomonas syringae* pv. *tomato* strain DC3000 (box plot; n = 20–24; Bacterial growth was determined 3 dpi after syringe infiltration of the leaves ( $1 \times 10^5$  CFU/ml). Significant differences were detected using two-way ANOVA (genotype *p-value* < 0.0001, temperature *p-value* = not significant, GxT *p-value* < 0.0001) followed by a Tukey post-hoc test. Letters indicate statistically different groups at 22°C. Plants were grown for 5 weeks at 28°C and 24 hrs prior to the inoculation shifted to 22°C. Three independent experiments were combined with each replicate showing the same trend. (B) Similar to (A) except that the plants remained at 28°C during the experiment. The letters indicate statistically different groups at 28°C. This experiment was done in parallel with (A).

<https://doi.org/10.1371/journal.pgen.1007157.g003>

*siz1 snc1-11* were both as susceptible as the wild type control (Fig 3B). This means that enhanced resistance of *siz1* to the pathogen PstDC3000 at 28°C was still dependent on EDS1 and SNC1.

In the case of *snc1-1*, high temperature suppression of immunity and restoration of growth were both reported to depend on PIF4 [24]. Therefore, we also tested if the *pif4-2* mutant showed altered resistance to PstDC3000 at 22°C/28°C. The *pif4-2* plants showed a clearly compromised thermomorphogenesis response at 28°C, *i.e.* (i) the hypocotyl length was reduced (Fig 4A and 4B), (ii) the rosette showed no hyponasty and (iii) the leaf blades and petioles failed to elongate in comparison to Col-0. However, the *pif4-2* mutant was as susceptible to PstDC3000 as the wild type control (Col-0) at either temperature in our conditions (Fig 3).

### Both SIZ1 and SUMO1/2 control dark and high temperature induced hypocotyl elongation

As *snc1-1* auto-immunity is inhibited by PIF4 at high temperature [24], the enhanced immunity of *siz1* to PstDC3000 at 28°C might also be due to reduced PIF4 function. In line with this notion, we found that *siz1* and the *sumo1/2<sup>KD</sup>* mutant both showed reduced hypocotyl elongation at 28°C in normal diurnal dark/light cycles (Fig 4A, light; 4B, compare 22C L with 28C L), implying that SIZ1 and the two archetype SUMO proteins, SUMO1 and SUMO2 (hereafter SUMO1/2), act as positive regulators of thermomorphogenesis similar to PIF4 (*pif4-2* was included as control for the loss of thermosensitive hypocotyl elongation; Fig 4A and 4B). SIZ1 and SUMO1/2 were both also needed for skotomorphogenesis (dark-induced hypocotyl elongation) at 22°C and 28°C (Fig 4A, dark; 4B, compare 22C L with 22C D). The compromised



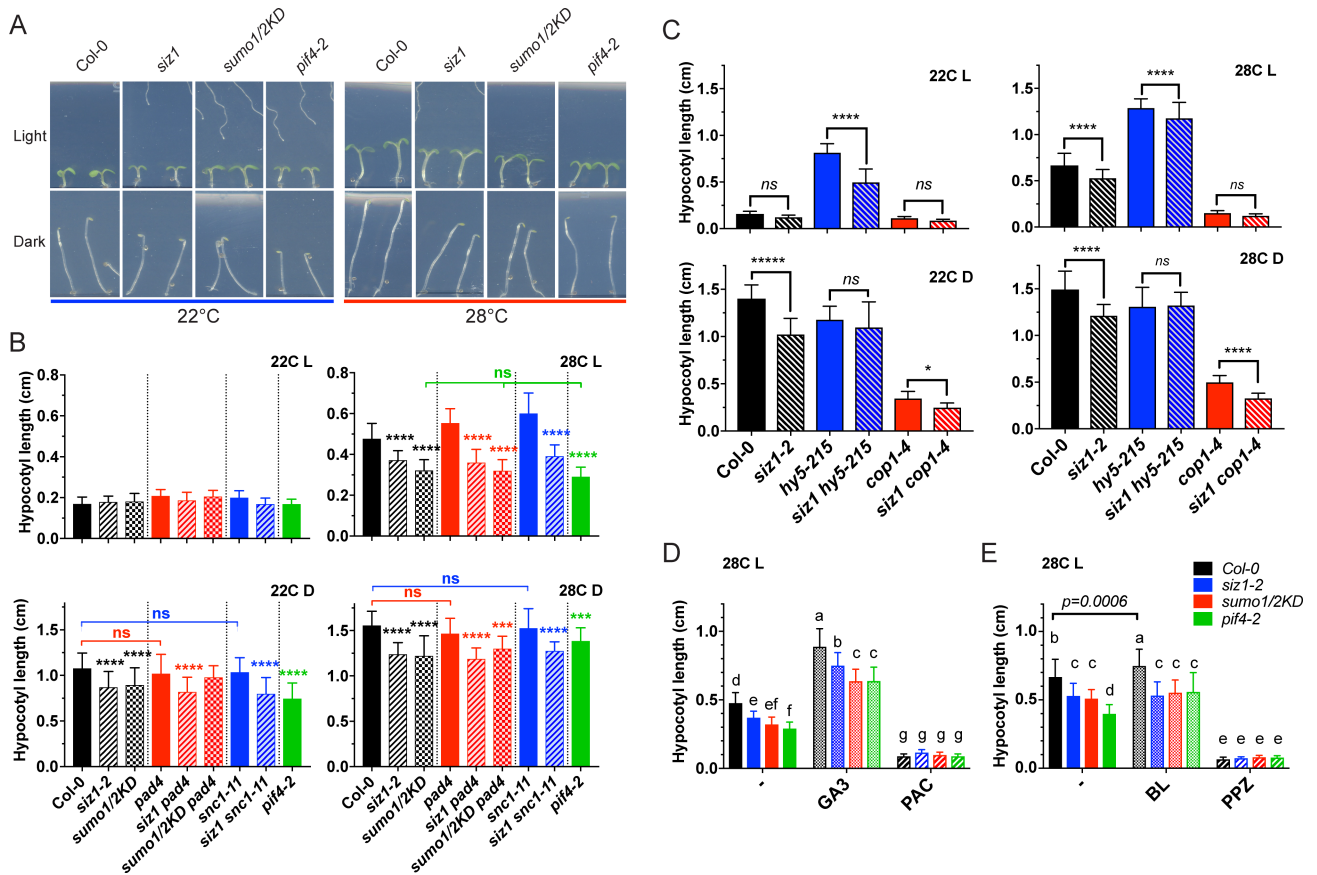

**Fig 4. SIZ1 enhances the temperature- and dark-induced hypocotyl elongation independent of PAD4 and SNC1.** (A) High temperature- and/or dark-induced hypocotyl elongation is compromised in *siz1* and *sumo1/2<sup>KD</sup>*. Wild type (Col-0) seedlings and *pif4-2* are shown as positive and negative control for thermosensory hypocotyl elongation, respectively. The pictures were taken 5 d post germination. (B) Bar graph (mean  $\pm$  standard deviation) depicting the hypocotyl length 5 days post germination in 4 conditions: 22°C L, 28°C L = germination of the seedlings in SD growth conditions at 22°C or 28°C, respectively; 22°C D, 28°C D = germination of the seedlings in the dark at 22°C or 28°C, respectively. Hypocotyl elongation is significantly reduced in *siz1* and *sumo1/2<sup>KD</sup>* in dark and/or high temperature conditions (compared to Col-0) independent of PAD4 or SNC1. Significant differences were determined using one-way ANOVA (for each condition separately) followed by a Tukey post-hoc test. The brackets indicate the result of the post hoc test for the connected genotypes; otherwise the asterisks denote the difference to the control line (Col-0, *pad4* or *snc1-11*); \*\*\*\*,  $p \leq 0.0001$ ; \*\*\*,  $p \leq 0.001$ ; \*,  $p \leq 0.05$ ; ns,  $p > 0.05$ ; n = 40–43 samples). The experiment was repeated twice with similar results. (C) Bar graph (mean  $\pm$  standard deviation) depicting the hypocotyl length of Col-0, *siz1*, *hy5-215*, *siz1 hy5-215*, *cop1-4*, and *siz1 cop1-4* in response to the same four conditions. SIZ1 is important for hypocotyl elongation of *hy5-215* in a normal dark/light cycles at 22°C (22C L). In dark conditions, loss of SIZ1 enhances the phenotype of the *cop1-4* mutant (22C D, 28C D). Significant differences were determined using one-way ANOVA followed by Tukey post hoc test. The brackets indicate the result of the post hoc test for the connected genotypes. (D) Bar graph (mean  $\pm$  standard deviation) depicting the hypocotyl length of the SUMO mutants (*siz1*, *sumo1/2<sup>KD</sup>*) in response to GA3 (10  $\mu$ M) or the GA3 biosynthesis inhibitor PAC (0.5  $\mu$ M). Gibberellin biosynthesis is needed for hypocotyl growth at 28°C (+PAC), as PAC fully inhibits hypocotyl elongation. Significant differences were determined using two-way ANOVA followed by Tukey post-hoc test; significantly different groups are indicated by the letters (n = 41–44). Seeds were germinated on plate and hypocotyl lengths were measured 5 days post germination at 28°C in SD. *siz1* and *sumo1/2<sup>KD</sup>* showed less germination on PAC (n = 8 and n = 32, respectively). All seeds were fresh and harvested simultaneously. The experiment was repeated twice with similar results (E) Similar to (D) except that seeds were germinated on 0.1  $\mu$ M Brassinolide (BL) or the BR biosynthesis inhibitor PPZ (2.0  $\mu$ M) with n = 41–52 samples.

<https://doi.org/10.1371/journal.pgen.1007157.g004>

dark and high temperature growth responses were both independent of *PAD4* and *SNC1*, as they still occurred to same extent in *siz1 pad4* and *siz1 snc1-11* (Fig 4B). This means that not the auto-immune phenotype of *siz1* is responsible for the compromised thermo/skotomorphogenesis, but rather that SIZ1 itself acts as positive regulator of these growth responses. In support of this notion, we confirmed that the *SNC1<sup>auto-I</sup>* mutants *cpr1*, *bon1*, and *srf1-4* display a normal thermomorphogenesis response (S4 Fig), indicating that PIF4 function is unaffected in them. Moreover, the *sumo1/2<sup>KD</sup>* consistently showed a stronger

reduction in hypocotyl elongation than *siz1* nearing *pif4-2* at the 28°C in a normal dark/light cycle (Fig 4B, 28°C L).

The mutants *siz1* and *sumo1/2<sup>KD</sup>* also displayed a strong reduction in hypocotyl elongation when they were kept in the dark at 22°C and 28°C (Fig 4B; panels 22C D, 28C D). As SIZ1 stimulates COP1 activity and the nuclear function of COP1 is activated in the dark [34,35], we examined whether loss of SIZ1 function could enhance the thermo/skotomorphogenesis phenotype of a strong but not lethal COP1 mutant, *cop1-4* [45]. Hypocotyl elongation was indeed more reduced in *siz1 cop1-4* than in *cop1-4* alone in dark conditions at 22°C and 28°C (Fig 4C; panels 22C D, 28C D). Thus, COP1 is critical for the thermosensory growth response—as recently reported [27], while SIZ1 appears to primarily enhance this response (as further detailed below).

In light conditions, the TF HY5 is known to inhibit hypocotyl elongation by inhibiting *PIF4* expression [25]. COP1 targets HY5 for proteasomal degradation when COP1 is active in the nucleus. We found that SIZ1 function is needed for the full hypocotyl elongation of the HY5 loss-of-function mutant *hy5-215* in a diurnal light/dark cycle at 22°C (Fig 4C, panel 22C L). This means that in a diurnal light/dark cycle at 22°C the stimulatory role of SIZ1 on hypocotyl growth is masked by the inhibitory role of HY5. We also compared the rosette size and morphology of *siz1 cop1-4* and *siz1 hy5-215* with the single mutants at both temperatures (S5 Fig). At 22°C *siz1 cop1-4* and *siz1 hy5-215* both adopted a *siz1* rosette size/morphology. At 28°C growth was recovered for *siz1 hy5-215*, but to a lesser extent than for *siz1*. In contrast, *siz1 cop1-4* failed to respond to the high temperature and this mutant still closely resembled *cop1-4* mutant (having a compact rosette with hardly any petioles and no hyponasty; S5A Fig). This is consistent with a model in which COP1 primarily conveys the thermosensory growth response and that SIZ1 amplifies the output of this response.

### Hormone biosynthesis is required for the SIZ1-dependent temperature induced growth

As biosynthesis of the hormones gibberellic acid (GA3) and the brassinosteroids is needed for the temperature induced hypocotyl elongation [46], we checked if the positive regulatory role of SIZ1 and SUMO1/2 in thermomorphogenesis requires these two hormones. First, we inhibited GA3 or BR biosynthesis by adding paclobutrazol (PAC) or propiconazole (PPZ), respectively. Irrespective of the genetic background, we found that biosynthesis of both hormones was essential for the temperature-induced hypocotyl elongation in the lines tested including the residual elongation in *pif4-2* (Fig 4D and 4E). GA3 is known to reduce the abundance of the DELLAs by triggering their degradation [47]. In turn the DELLAs restrain cell growth by reducing protein abundance of the PIFs (including PIF4) and the TF BZR1 (Brassinazole resistance 1) [48,49]. A combined treatment of 28°C+GA3 resulted in increased hypocotyl elongation for each of the four tested lines compared to the 28°C control (-) (Fig 4D). However, hypocotyl elongation was still impaired for *siz1*, *sumo1/2<sup>KD</sup>* and *pif4-2* in the combined treatment 28°C+GA3 (Fig 4D). This implies that the positive role of SIZ1 on temperature-induced hypocotyl growth is independent of DELLA accumulation. The combined treatment of 28°C plus the brassinosteroid Brassinolide (28°C+BL) triggered a small but significant increase in hypocotyl elongation in the control (Col-0) plants compared to the mock treatment (Fig 4E, — vs. BL). However, the SUMO mutants (*siz1* and *sumo1/2<sup>KD</sup>*) showed no additional response to the combined treatment 28°C+BL (Fig 4E). Strikingly, the *pif4-2* mutant did respond to the BL treatment (from post hoc group D to C), suggesting that in *siz1* and *sumo1/2<sup>KD</sup>* brassinosteroid signalling is apparently already at its maximum physiological level.

## SIZ1 controls amplitude and timing of the transcriptional response to high temperature in part via PIF4/BZR1

To elucidate how SIZ1 and SUMO1/2 conjugation affect high temperature-induced gene expression, we grew *siz1 pad4* and the *sumo1/2<sup>KD</sup> pad4* mutants for two weeks at 22°C and then shifted them to 28°C (4 hrs after light onset) to trigger a temperature induced transcriptional response. To avoid that constitutive (auto-)immune signalling impedes the thermosensory transcriptional response at  $t = 0$ , we performed the experiment in the *pad4* background, which largely blocked *siz1* auto-immunity at 22°C (i.e. the enhanced accumulation of PR1 and PR2, spontaneous cell death and the increased resistance to PstDC3000 are suppressed in *siz1 pad4*; Figs 1F, 1G and 3A), but it only partially restored the dwarf stature. Importantly, increased resistance to PstDC3000 was not lost in *siz1 pad4* at 28°C, similar to *siz1* (Fig 3B). The plants were sampled at the shift to 28°C (day 0) and 24hrs (day 1) and 96 hrs (day 4) after the shift. Catala *et al.* had previously shown that *siz1* shows a strong up-regulation of defence-related genes (like PR genes and immune receptors), while genes involved in BR biosynthesis/signalling are down-regulated [50]. We first determined which genes are differentially expressed at 22°C in *siz1 pad4* in comparison to the control (*pad4*). We found that a small set of genes encoding for TNL immune receptors, Receptor-like kinases (RLKs), and Receptor-like proteins (RLPs) remained up-regulated in *siz1 pad4* in comparison to the control (*pad4*) at 22°C (S1A Table). *SNCI* or immune receptors of the CNL type (Coiled-coil NB-LRR-type) were not amongst the up-regulated genes in the microarray data. Real time PCR revealed that *SNCI* was roughly two-fold induced in *siz1 pad4* (close to the cut-off value for differential gene expression), while *SNCI* showed no up regulation in *siz1 eds1* or *siz1 NahG* (S1C Fig). As *SNCI* was 5-fold induced in *siz1* at 22°C (S1C Fig), we conclude that this requires feedback regulation via EDS1 and *SNCI*.

There was no broad up-regulation of TF families linked to plant immunity (WKRY, TGA or MYC family) in *siz1 pad4* at 22°C. Likewise, PR genes like *PR2*, *PR3*, or *PR4* were no longer strongly up-regulated in *siz1 pad4* at 22°C. The genes involved in BR biosynthesis and signalling were also no longer collectively down-regulated except for two genes, which encode for two rate-limiting enzymes of the Brassinosteroid (BR) biosynthesis pathway (*DWF4* or *DWARF 4*; and *BR6OX2* or *BRASSINOSTEROID-6-OXIDASE 2*) [51–53]. This suggests that the BR levels might be reduced in *siz1 pad4*. In agreement with this, we found that the TFs *BEE1*, *BEE3*, and *TCP1* are down-regulated in *siz1 pad4* (S1B Table). *BEE1* and -3 are two closely related bHLH TFs that act as early response TFs required for the full BR response [54]. *TCP1* encodes a TF that directly positively regulates the expression of *DWF4* [55]. Combined, these data argue that the *siz1 pad4* phenotype may be (partially) due to BR-deficiency.

We then selected the set of thermosensitive genes by identifying the genes that are differentially expressed (DEGs,  $q \leq 0.01$ ) in *pad4* in response to the shift to 28°C (comparing day 1 to day 0, day 4 to day 1, and day 4 to day 0). The DEGs were clustered based on their expression profile and their expression dynamics was revealed by plotting their standardized expression values in a clustered heat map (Fig 5A, red-to-blue). To detect differences in the gene expression profiles of *siz1 pad4* and *sumo1/2<sup>KD</sup> pad4* we plotted the same gene expression heat maps for the two mutants while retaining the gene clustering (Fig 5A). We also plotted the difference in gene expression ( $\Delta$ ) between the mutants (*siz1 pad4* and *sumo1/2<sup>KD</sup> pad4*) and *pad4* (brown-to-cyan heat maps). Fig 5A reveals that overall the gene expression profiles of the thermosensitive genes do not differ strongly between the two SUMO conjugation mutants and the control *pad4* (blue-to-red heat maps). In other words, most of the thermosensitive genes also respond to the shift to 28°C in *siz1 pad4* or *sumo1/2<sup>KD</sup> pad4* as they do in *pad4*.

However, most of the thermosensitive genes appear to show an attenuated response in *siz1 pad4* and *sumo1/2<sup>KD</sup> pad4* at day 1 and/or 4. For example the up-regulated genes (changing

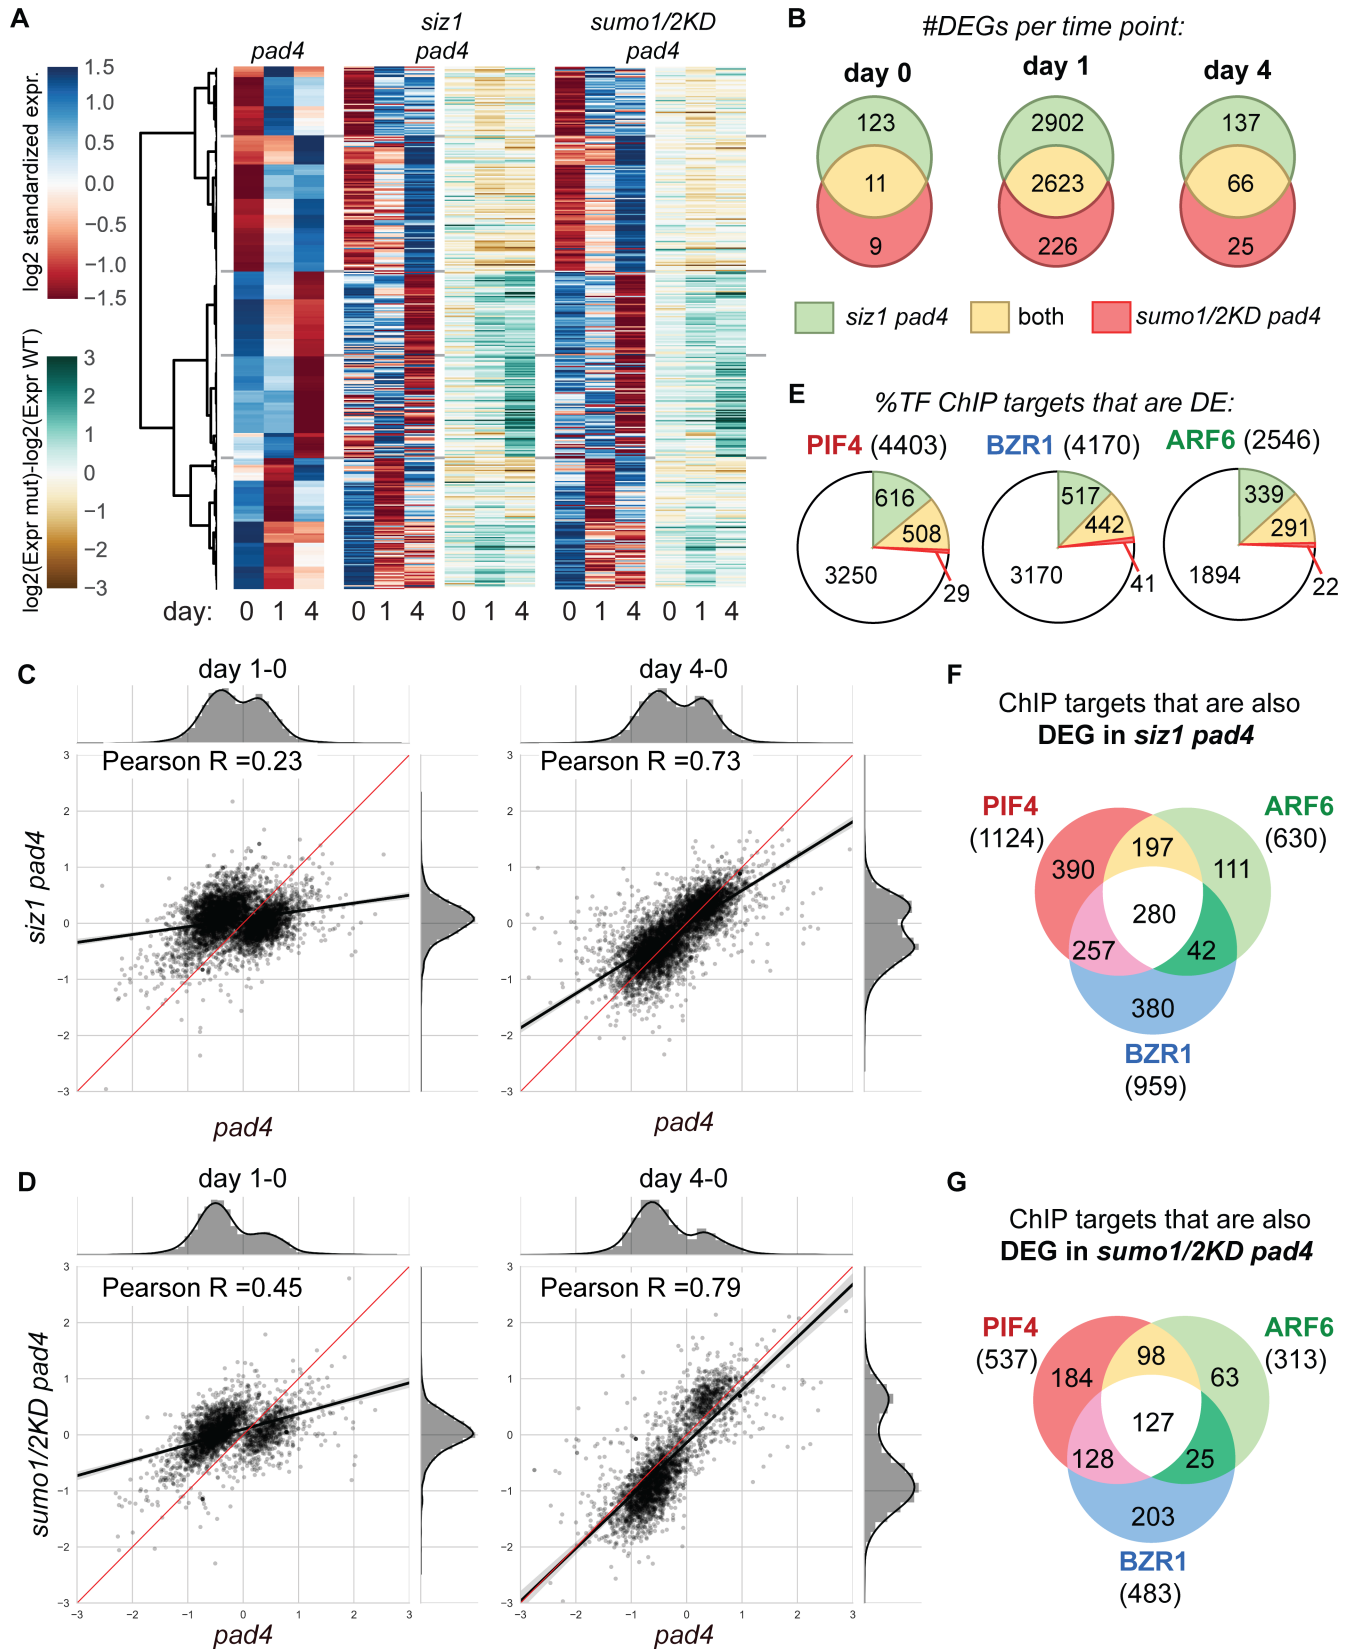

**Fig 5. SIZ1 promotes the timing and amplitude of the expression of thermosensitive genes, including genomic targets of the transcription factors PIF4/BZR1.** (A) Heat maps representing thermosensitive genes, i.e. differentially expressed genes in *pad4* in response to the shift to 28°C and their expression profiles in the *siz1 pad4* and *sumo1/2<sup>KD</sup> pad4* mutants (blue-to-red diagrams). Gene clustering was based on Pearson correlation of the expression profiles in *pad4* (shown on the left). To reveal gene expression dynamics over time in the mutants versus *pad4*, the expression values were standardized (zero mean, unit variance per profile). Of note, the expression profiles of the thermosensitive genes were largely similar for the three genotypes. In addition, the relative difference-in-expression (log2 fold change, non-standardized) is shown for the thermosensitive genes in '*siz1 pad4* versus *pad4*' and '*sumo1/2<sup>KD</sup> pad4*' (brown-to-cyan depicting *less expressed-to-more expressed* in the mutant). (B) Venn diagrams showing the total number of differentially expressed genes (#DEGs,  $q \leq 0.01$ ) in *siz1 pad4* (green), *sumo1/2<sup>KD</sup> pad4* (red) and their overlap (yellow) in comparison to *pad4* at the three time points. The largest change in global gene induction/repression occurs at day 1 in both two mutants. (C) Scatter plot depicting the change-in-expression at day 1 or 4 with respect to the expression at day 0 (day 1–0; day 4–0) for all the DEGs in *siz1 pad4* (y-axis) in comparison to their change in expression in *pad4* (x-axis). The DEGs are the same as panel (B). For each DEG is shown the log2-fold change-in-expression. The density plots at the right and top depict the global change in expression for these DEGs in the mutant and the wild type, respectively. The black lines depict a Pearson linear regression analysis for all the DEGs with the 95% confidence interval indicated by the grey zone. The red line depicts an equal change in expression for all genes in *siz1 pad4* versus *pad4*. (D) Similar to (C), but the scatter plot depicts the change in expression for the DEGs in *sumo1/2<sup>KD</sup> pad4* in comparison to *pad4*. (E) Pie diagrams depicting the total number of direct genomic targets of PIF4, BZR1 and ARF6, retrieved from published chromatin immunoprecipitation (ChIP) datasets (Adapted from [56]), and the number these targets that are differentially expressed (DE) in *siz1 pad4* (green+yellow) or *sumo1/2<sup>KD</sup> pad4* (red+yellow). These two sets are a combination of the DEGs from panel B. The overlap between the genomic targets of these three TFs and the DEGs in *siz1 pad4* and *sumo1/2<sup>KD</sup> pad4* was significant (*p-values* for *siz1 pad4*: PIF4, 3.1e-24; BZR1, 2.1e-8; ARF6, 9.2e-11; *p-values* for *sumo1/2<sup>KD</sup> pad4*: PIF4, 1.2e-6; BZR1, 6.9e-4; ARF6, 1.5e-4; hypergeometric test). (F) Venn diagram depicting the overlap between the genomics targets of PIF4, BZR1 and ARF6 that are differentially expressed in *siz1 pad4* over the course of the experiment. Most DEGs are a target of PIF4 and/or BZR1. (G) Venn diagram depicting the overlap between the genomics targets of PIF4, BZR1 and ARF6 that are differentially expressed in *sumo1/2<sup>KD</sup> pad4* over the course of the experiment.

<https://doi.org/10.1371/journal.pgen.1007157.g005>

from red at day 0 to blue at day 4 in the heat maps) show less expression in *siz1 pad4* and *sumo1/2<sup>KD</sup> pad4* than *pad4* at day 4 (brown colour in the 'ΔExpr (mut-WT)' heat maps). Likewise, the down-regulated genes (shift from blue at day 0 to red at day 4) show increased expression in *siz1 pad4* and *sumo1/2<sup>KD</sup> pad4* at day 4 (cyan colour in the 'ΔExpr (mut-WT)' heat maps). To confirm this notion, we selected for each time point the DEGs in *siz1 pad4* and *sumo1/2<sup>KD</sup> pad4* in comparison to *pad4*. A large set of these DEGs was shared between the two mutants (*siz1 pad4* and *sumo1/2<sup>KD</sup> pad4*), as can be seen in the VENN diagrams (Fig 5B). Strikingly, the largest number of DEGs was obtained for both mutants at day 1 rather than at day 4. To visualize the dynamic response of these DEGs in response to high temperature, we plotted in a scatter plot the fold change in expression of these DEGs for *siz1 pad4* and *sumo1/2<sup>KD</sup> pad4* (both y-axis) versus *pad4* (x-axis) (by separately combining the DEGs for the different time points for the two mutants). The left panel in Fig 5C and 5D depicts the change in expression from day 0 to day 1, while the right panel depicts the change from day 0 to day 4. This revealed that primarily in the control (*pad4*) at day 1 the expression of the DEGs changed due to the increase in temperature, while in *siz1 pad4* and *sumo1/2<sup>KD</sup> pad4* these genes largely failed to respond at this time point (Fig 5C and 5D, panel day 1–0). This is best seen in the global expression profiles (top and right side of the scatter plot) revealing a double hump in *pad4*, while the expression profile displays a single Gaussian curve around zero for both SUMO mutants. In contrast, at day 4 we find a positive correlation for the change in expression of all DEGs (Pearson  $R = 0.73$ ; linear regression) with a slope = 0.61 for *siz1 pad4* versus *pad4*. This means that at day 4 the DEGs responded in *siz1 pad4* to the high temperature, but their response was overall attenuated. A similar situation is seen for *sumo1/2<sup>KD</sup> pad4* at day 4 (Pearson  $R = 0.79$ ; slope = 0.87). Thus, SIZ1 and SUMO1/2 both appear to control in a similar manner both the timing and the amplitude of the temperature-induced transcriptional response.

We then examined if the direct genomic targets of the TFs PIF4/BZR1/ARF6 are differentially expressed in *siz1 pad4* and *sumo1/2<sup>KD</sup> pad4*. The direct genomic targets of these tree TFs, which form a trimeric transcriptional hub, were obtained from published chromatin-immunoprecipitation (ChIP) datasets of these TFs [56,57]. As shown in Fig 5E, nearly 25% of the genomic targets of these three TFs was differentially expressed in *siz1 pad4* during the course of the temperature shift experiment. This overlap was very significant with *p-values* of 3.07e-21 (PIF4), 2.11e-8 (BZR1), 9.24e-11 (ARF6) using a hypergeometric test (based on 26859

annotated probes; TAIR9). The overlap was still significant but less strong for *sumo1/2<sup>KD</sup> pad4* (with an overlap of  $\pm 12\%$ , Fig 5E) and *p-values* of 1.17e-6 (PIF4), 6.92e-4 (BZR1), 1.46e-4 (ARF6). Thus, there is a significant enrichment for the genomic targets of these three TFs amongst the DEGs in both our mutants in response to shift to temperature 28°C (Fig 5E). The change in expression of these genomic targets of these three TFs in the mutants versus the control (*pad4*) mirrored largely the global pattern seen for all the DEGs combined (S6 and S7 Figs). Thus, the response of the misexpressed genomic targets of PIF4, BZR1, and ARF6 in the *siz1 pad4* and *sumo1/2<sup>KD</sup> pad4* mutants follows the same trend as the global response (i.e. their expression is largely delayed till day 4 and the response remains attenuated at day 4). This corroborates our hypothesis that the PIF4-dependent high-temperature growth response is compromised in *siz1* and *sumo1/2<sup>KD</sup>*. We also looked at the genomic targets of the ‘cold’ regulator HY5 that binds to and competes (at low temperature) for the same genomic targets as PIF4 [58,59]. The HY5 genomic targets largely failed to respond in *siz1 pad4* at day 1, while at day 4 their response was largely attenuated in *siz1 pad4* compared to *pad4* (S8C and S8D Fig). This effect on the expression of the HY5 genomic targets was less clear for *sumo1/2<sup>KD</sup> pad4* (S9C and S9D Fig). While examining the list of DEGs we noted that many SAUR (Small auxin up RNA) genes were present among the top of the gene lists. PIF4 is known to regulate auxin biosynthesis via the SAUR family [60]. The differentially expressed SAUR genes showed a strong deregulation in *siz1 pad4* and *sumo1/2<sup>KD</sup> pad4* at both time points, with very distinct global expression profiles in the mutants versus the control (*pad4*) (S8E, S8F, S9E and S9F Figs). Combined, our data revealed that the *siz1 pad4* and the *sumo1/2<sup>KD</sup> pad4* mutants display a delayed and attenuated transcriptional response to high temperature (in comparison to *pad4*), which runs in part over the PIF4/BZR1 transcriptional hub.

## Discussion

Here, we describe an interconnected dual role for SIZ1 and SUMO1/2 conjugation in the switch between plant immunity and high temperature induced growth (as summarized in the model of Fig 6). Our data unveil that both SIZ1 and SUMO1/2 conjugation are positive regulators of thermo- and skotomorphogenesis upstream of the PIF4/BZR1 growth regulation hub. In this hub, BZR1 is activated by the hormone BL, while PIF4 is activated by dark conditions and high ambient temperature. In line, these two TFs share a large number of genomic targets that are synergistically regulated by them [56]. We find that loss of SIZ1 and SUMO1/2 both delays and attenuates this transcriptional response to high temperature affecting many targets of PIF4 and BZR1. This suggests that SIZ1 activity acts as a positive regulator of PIF4 function in thermomorphogenesis and that PIF4 function is apparently compromised/inhibited in *siz1* at high temperature (Fig 6, *siz1-2*). Importantly, the PIF4 protein abundance is positively regulated by COP1 E3 ligase activity [58], while COP1 activity is stimulated by SIZ1-dependent sumoylation (Fig 6, wild type route c.) [34,35]. Our data unveil that COP1 is essential to convey this high temperature signal, as recently reported by others [27], while SIZ1 enhances the high temperature and dark signal. This role of SIZ1 in thermo/skotomorphogenesis is distinct from its reported role on cell elongation due to constitutive defence signalling [61], as hypocotyl elongation was still compromised at high temperature when PAD4 or SNC1 were mutated. Likewise, we noted that the rosette of *siz1 pad4*, *siz1 eds1*, and *siz1 NahG* remained compact at 28°C (without strong petiole elongation or hyponasty as seen for Col-0).

Interestingly, part of the *siz1* auto-immune phenotype is sustained at high temperature resulting in enhanced resistance to bacteria (Fig 3). This enhanced resistance still required SNC1 and EDS1 function at 28°C (Fig 3, Fig 6 wild type route a.). The latter is relevant, as both SNC1 and EDS1 immune signalling depend on their nuclear localization, while SNC1

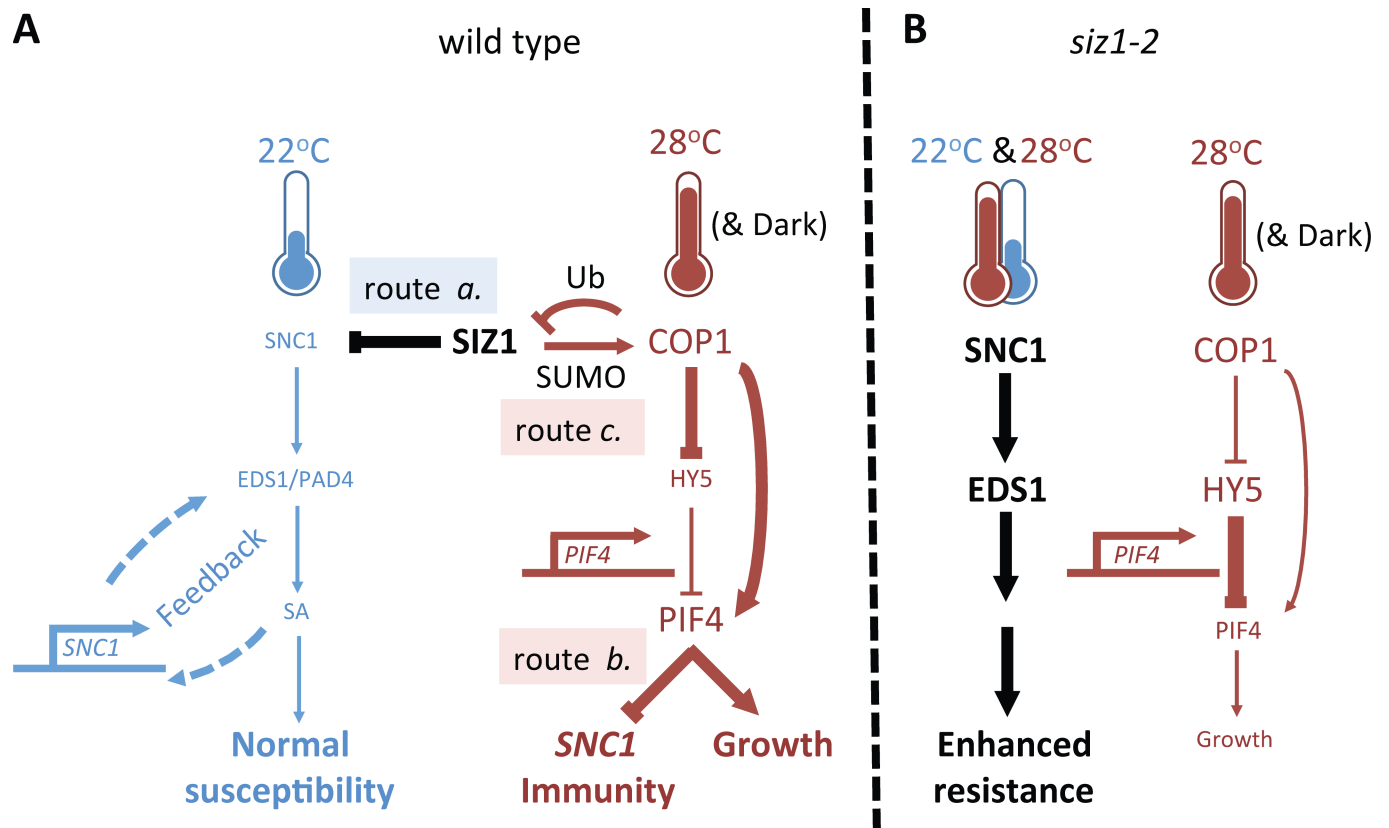

**Fig 6. Model depicting the role of SIZ1 in (i) SNC1-dependent auto-immunity and (ii) thermosensory growth via COP1 and PIF4. (A)** Wild type situation; SIZ1 inhibits at the transcription and/or protein level SNC1-dependent auto-immunity (route a.). This involves PAD4, EDS1, SA accumulation, and transcriptional feedback regulation. SNC1 auto-immunity is suppressed at 28°C by PIF4 function, at least for the mutant *snc1-1* (route b.) [24]. SIZ1 sumoylation of COP1 stimulates the intrinsic ubiquitin (Ub) E3 ligase activity of COP1 resulting in degradation of COP1 substrates, including HY5 and SIZ1 [34,35] (route c.). In this way, SIZ1 amplifies and tunes COP1 activity at high temperature and/or dark conditions (based on Fig 4). (B) In the *siz1-2* mutant, auto-immunity is not inhibited at low and only partially at high temperature. This results in enhanced resistance to bacteria in *siz1-2* at low and high temperature, while requiring EDS1 and SNC1 function (Fig 3). COP1 activity is required to convey thermosensing resulting in less hypocotyl elongation growth in *cop1-4* mutant (Fig 4C). This (residual) COP1 activity is reduced when SIZ1 is mutated (based on Fig 4C; [34,35]). As inhibition of *snc1-1* auto-immunity at high temperature requires PIF4 function, it appears that route b. is compromised or absent in the *siz1-2* mutant. The blue/red/black arrows depict signalling routes at 22°C, 28°C, or that are independent of these temperatures, respectively. The thickness of the arrows marks the amount of protein activity.

<https://doi.org/10.1371/journal.pgen.1007157.g006>

nuclear localization is impaired at high temperature [7,12,22,62]. High temperature suppression of *snc1-1* auto-immunity and concomitantly rescue of its growth phenotype requires PIF4 function [24] (Fig 6 wild type route b.). SNC1-dependent auto-immunity, including enhanced resistance to the bacterial pathogen *Pseudomonas*, is normally fully suppressed in the mutants *bon1*, *crp1-2* and *snc1-1* at 28°C, resulting in normal rosette growth (e.g. Figs 1–3) [7,63]. However, *siz1* fails to resume normal growth at 28°C and this is independent of PAD4/EDS1, SNC1 or SA accumulation. This implies that the ‘high temperature’ signal is not properly conveyed in *siz1*. At the same time, SIZ1 suppresses expression of a small subset of immune receptors at 22°C, even when PAD4 is mutated. It remains an open question if elevated expression of one of these immune receptors (S1A Table) is causal for the auto-immune phenotype of *siz1*, rather than the misexpression of SNC1.

Biochemically, SUMO conjugation was already implied as a regulator of photomorphogenesis [34,35]. Our data suggest that the role of SIZ1 in thermomorphogenesis is mechanistically independent of light sensing, as hypocotyl elongation in *siz1* was also reduced in the dark. Previous works had indicated that sumoylation of phyB allows PIF5 to bind its target promoters

resulting in root growth stimulation. These authors demonstrated that sumoylation of the Pfr state (red light activated state) of phyB suppresses the interaction between phyB and PIF5, the closest homologue of PIF4 [32,64,65]. Our GA3 treatment experiment also suggests that SIZ1 controls thermomorphogenesis response independent of DELLA accumulation (Fig 4D). The DELLAs control the stability of the PIFs, while they themselves are also controlled by sumoylation [31,49]. Other (putative) sumoylation substrates implicated in PIF4 function are ELF3 (Early flowering 3) [43,66], HFR1 [67] and LAF1 [68], HY5 and HY5-like (HYL) [69]. The role of sumoylation has not yet been determined for ELF3. Both HFR1 and LAF1 are also targets for COP1-mediated degradation. The link between their degradation and sumoylation remains to be studied. Nevertheless, it is evident that (i) SUMO conjugation acts at multiple levels as a regulator of growth and that (ii) certain COP1 substrates are also targets for sumoylation.

Finally, we found that several actors in BR biosynthesis and signalling are still down-regulated (*DWF4*, *BEE1*, *BEE3*, and *TCPI*) in *siz1 pad4*. CESTA, a close homologue of BEE1 and BEE3, is another SUMO substrate that directly binds to BEE1 to control BR biosynthesis [70]. Catala and co-workers had previously reported that from the nearly 1600 differentially expressed genes in *siz1* (>two-fold change), eleven down-regulated genes were known to be critical for BR biosynthesis and signalling [50]. In addition, they found in their genome-wide expression analysis that both *PIF4* and *PIF5* were underexpressed in *siz1* [50]. These data warrant further research on the role of sumoylation on BL signalling and biosynthesis.

To conclude, SIZ1 and SUMO1/2 both act as important positive regulators of growth, while SIZ1 also acts as negative regulator of an SNC1-dependent immune response at high temperature. SIZ1 thus plays an interdependent dual role in growth and immunity at elevated ambient temperature.

## Materials and methods

### Plant materials and growth conditions

The genetic resources for this research were wild type *Arabidopsis thaliana* ecotype Col-0, *siz1-2* [71], *cop1-4* [45], *cpr1-2* [18], *bon1-1* [10], *hy5-215* [72], *snc1-1* [19], *srfr1-4* [15], *pad4-1* [73], *eds1-2* (backcrossed in Col-0) [74], *sid2-1* [40], *35Spro::NahG* [75], *snc1-11* (SALK\_047058) [10], *sgt1a-3* [16], *sgt1b(eta3)* [76], *rar1-21* [77], *pif4-2* [78], and *sumo1/2<sup>KD</sup>* [aka *sum1-1 amiR-SUMO2* line B] [29,79]. The double mutants *pad4 siz1*, *NahG siz1* [28], *cop1-4 siz1-2* and *hy5-215 siz1-2* [35] are described elsewhere. *Arabidopsis* plants were grown under white light with 120  $\mu\text{mol m}^{-2} \text{sec}^{-1}$  under short-day (SD) light conditions (11 hr light, 13 hr dark) at 22°C or 28°C on a compost/perlite soil mixture. After crossing, the plants were genotyped according to the primer combinations and primer sequences presented in the S2 and S3 Tables, respectively.

### Fresh rosette weight measurements

The fresh rosette weight of plants (minimum 8) grown individually in single pots was measured. The rosette was sampled from 5-week-old plants grown in parallel at 22°C or 28°C. Statistical analyses were made using two-way ANOVA (genotype, temperature, interaction GxT) followed by Tukey post hoc test in Prism7. Significantly different groups are indicated by letters.

### Protein analysis

For immunoblot analysis, seedlings or leaf material was homogenized in liquid nitrogen, thawed on ice in extraction buffer (10% glycerol, 50 mM  $\text{K}_2\text{HPO}_4/\text{KH}_2\text{PO}_4$  pH 7.5, 150 mM



NaCl, 1 mM EDTA, 2% w/v polyvinylpyrrolidone K25, 1× protease inhibitors (Roche), 1% v/v Nonidet P-40, 0.1% SDS and 5 mM DTT), and centrifuged for 10 min at 13,000g. The supernatant was mixed 1:1 with 2× SB (125 mM Tris-HCl pH 6.8, 4% SDS, 20% v/v glycerol, and 100 mM DTT), and the samples were boiled for 10 min. Proteins were separated on 15% SDS-PAGE and blotted onto Polyvinylidene fluoride (Immobilon-P, Millipore) membranes. Secondary immunoglobulins conjugated to horseradish peroxidase were visualized using ECL Plus (GE Healthcare). Primary antibodies against PR1 ( $\alpha$ PR1) were described previously [80] and  $\alpha$ PR2 was obtained from Agrisera (#AS12 2366, ~35kDA). Incubation of both primary and secondary antibodies were done in Tris-buffered saline with 0.05% Tween-20 (TBST) followed by three rinses of 10 minutes in TBS. Equal protein loading was confirmed for the samples by Ponceau S staining of the membranes and when needed the loaded total protein amounts were standardized using BCA protein analysis on the total protein extracts prior to protein loading of the gels. The primary antibodies  $\alpha$ PR1,  $\alpha$ PR2 and the secondary antibody Goat-anti-Rabbit HRP (Fisher) were used at 1:5000, 1:2000 and 1:5000 dilutions, respectively.

### Quantitative gene expression analysis

For the gene expression analysis, total RNA was extracted from 100–200 mg of leaf material of 5-week-old plants grown at 22/28°C using TRIzol LS reagent (Fisher). The RNA was treated with DNase (ThermoFisher) according to the supplier's protocol and RNA concentrations were determined by measuring the Abs(260) on a Nanodrop. cDNA was synthesised from 1  $\mu$ g total RNA using RevertAid H reverse transcriptase in the presence of the RNase inhibitor Ribolock (both ThermoFisher) following the supplier's protocol. All biological samples were measured in technical replicate with 3–4 biological replicates per experiment. The PCR amplification was followed using Hot FIREPol EvaGreen qPCR (Solis Biotyne) in a QuantoStudio3 (ThermoFisher). Gene expression was normalized using two genes: *Actin2* (At3g18780) and *beta-Tub4* (At5g44340). The primers used are given in the [S2 Table](#). The Ct values were corrected for primer efficiencies. All expression data were analysed using the pipeline in qBASE+ (Biogazelle).

### Hypocotyl elongation measurements

Cold-stratified (3 days at 4°C) sterilized seeds (~50 per line) were placed on vertical plates with 1/2 MS medium supplemented with 1% w/v sucrose and 1% w/v Daishin agar (Duchefa). Seeds were irradiated with white light for 6 hrs to promote germination and then incubated in the specified light/temperature conditions for 5 days. The used seeds were fresh and from the same seed harvest. Seedlings were scanned and the hypocotyl lengths were measured using ImageJ (<http://rsb.info.nih.gov/ij>). Sensitivity to the Gibberellin biosynthesis inhibitor Paclobutrazol (Pac, Duchefa) and the hormone Gibberellic acid (GA3, Duchefa) was analysed by growing the seedlings on 0.5  $\mu$ M PAC or 10  $\mu$ M GA3, respectively. Likewise, sensitivity to the Brassinosteroid biosynthesis inhibitor Propiconazole (PPZ, Sigma-Aldrich) or the hormone 24-epiBrassinolide (BL, #b1439, Sigma-aldrich) was analysed by adding 2  $\mu$ M PPZ or 0.1  $\mu$ M BL to the plates, respectively.

### Pseudomonas disease assay

*Pseudomonas syringae* pv. *tomato* DC3000 (PstDC3000) [81] (carrying the empty vector pVSP61) was freshly grown overnight at 28°C with 200 rpm in 10 mL Kings B broth [82] supplemented with rifampicin (50  $\mu$ g/mL) and kanamycin (40  $\mu$ g/mL) to reach an OD600 of ~0.9–1.2. Directly prior to infiltration, the bacterial suspensions were spun down, washed with 10 mM MgSO<sub>4</sub>, and resuspended at OD600 = 0.0002 (1×10<sup>5</sup> CFU/mL) in 10 mM MgSO<sub>4</sub> for syringe leaf infiltrations. For the Pst disease assays the plants were germinated and grown at

28°C constant temperature (with 11L/13D) for 5 weeks in soil. Twenty-four hours prior to inoculation (9:00 am), one batch of plants was moved to 22°C (SD) and both plant sets were placed in propagators to increase humidity (>90%). The two plant batches were simultaneously infiltrated at 22°C and 28°C using the same bacterial suspension. Upon infiltration the plants were left to dry for 1.5–2 hrs after which they were again covered with lids for 72 hours to increase humidity (>90% relative humidity). Humidity and temperature was followed using a data logger inside the propagators for the duration of the experiment. Leaf discs were taken 1 hour after dipping ( $t = 0$ ) at both temperatures and 72 hrs post infiltration ( $t = 3$ ). At least 6 plants were infiltrated per condition. In total 8 samples were taken for each condition combining 2–3 leaf discs with a diameter of 5 mm. Leaf discs were taken from different leaves and only ‘mature’ fully elongated rosette leaves were sampled. The first-formed round shaped leaves were excluded from tissue sampling. The sampled intact leaves were surface-sterilized prior to taking leaf discs (10 sec dip in 70% ethanol followed by two washes with sterile water). The disease assays were performed with at least two independent replicates with similar results.

### Cell death analyses using trypan blue staining

The rosette leaves were stained with a 1:1 mixture (v/v) of ethanol and lactic acid–phenol–trypan blue solution (2.5 mg mL<sup>-1</sup> trypan blue, 25% v/v lactic acid, 25% phenol, 25% glycerol, and water) and boiled for 5 min. For destaining, the trypan blue solution was replaced with a chloral hydrate solution (2.5 g mL<sup>-1</sup> in water), as described [83].

### Microarray gene expression analysis

The *siz1 pad4*, *sumo1/2<sup>KD</sup> pad4*, and *pad4* plants were grown on soil in SD conditions at 22°C for 2 weeks and then transferred to 28°C at noon ( $t = 0$ ). Leaf samples were taken in triplicate for total RNA extraction at  $t = 0$ , 24 hrs (1d), and 96 hrs (4d). Total RNA was purified using the RNeasy mini kit (QIAGEN). The RNA quality was examined by monitoring Abs(260/280) and the Abs(260/230) ratios. Total RNA (100 ng) was amplified using the GeneChip WT PLUS kit (Affymetrix) generating biotinylated sense-strand DNA targets. The labelled samples were hybridized to Arabidopsis Gene 1.1 ST arrays (Affymetrix). Washing, staining and scanning was performed using the GeneTitan Hybridization, wash, and stain kit for WT Array Plates, and the GeneTitan Instrument (both Affymetrix).

All arrays were subjected to a set of quality control checks, such as visual inspection of the scans, checking for spatial effects through pseudo-color plots, and inspection of pre- and post-normalized data with box plots, ratio-intensity plots and principal component analysis. Normalized expression values were calculated using the robust multi-array average (RMA) algorithm [84]. The experimental groups were contrasted to test for differential gene expression. Empirical Bayes test statistics were used for hypothesis testing [85] using the Limma package in R 3.2.1 (<http://cran.r-project.org/>), and all *p-values* were corrected for false discoveries according to Storey and Tibshirani [86]. Downstream statistical analyses (e.g. hypergeometric tests on enrichment) were performed in Python using the Scipy.stats module (<https://scipy.org/scipylib/>). The microarray data were deposited in Gene Expression Omnibus (GEO, <http://www.ncbi.nlm.nih.gov/geo/>) under the accession number GSE97641 and Github (DEGs and scripts used to prepare Fig 5; [https://github.com/LikeFokkens/Siz1\\_immunity-vs-growth\\_temperature](https://github.com/LikeFokkens/Siz1_immunity-vs-growth_temperature)).

### Supporting information

**S1 Table. SIZ1 inhibits expression of several immune receptors independent of PAD4, while allowing expression of two rate-limiting enzymes in Brassinosteroid synthesis.**

(A) List of genes encoding TNLs, Receptor-like kinases (RLKs), and Receptor-like proteins (RLPs) genes whose expression is induced in *siz1 pad4* compared to *pad4* at 22°C, ranked by fold change. Up-regulation of these genes is SIZ1-dependent while independent of PAD4. Statistical significant differences are indicated with *q values*.

(B) Similar to (A). Brassinosteroid biosynthesis is possibly reduced in *siz1 pad4*. Expression of the genes *DWF4*, *BR6OX2*, *BEE1*, *BEE3*, and *TCP1* is down-regulated in *siz1 pad4* relative to *pad4* at 22°C. *DWF4* and *BR6OX2* catalyse two rate-limiting reactions of brassinosteroid biosynthesis. *BEE1*, *BEE3* and *TCP1* are TFs involved in brassinosteroid signalling. Statistical significances differences are indicated with *q values*.

(DOC)

**S2 Table. Primers used in this study.**

(DOC)

**S3 Table. Primer combinations used to genotype the different Arabidopsis alleles used in this study.**

(DOC)

**S1 Fig. EDS1, PAD4 and SA accumulation are needed for full induction of marker genes of defence and SNC1 in the mutant *siz1*.** Normalized gene expression of the defence marker genes *PR1* (A), *PR2* (B) and *SNC1* (C) using qRT-PCR (mean ± SE, Col-0 at 22°C = 1). RNA was isolated from 5-week-old plants. 3–4 biological replicates were measured in technical replicate. The experiment was repeated twice and the data combined. Experiment is part of the same set shown in Fig 2E.

(JPG)

**S2 Fig. The *siz1* dwarf phenotype partially depends on SNC1 at 22°C.** The picture was taken using 6-week-old flowering plants.

(JPG)

**S3 Fig. The chaperones SGT1a, SGT1b and RAR1 are partially required for the auto-immune phenotype of *siz1*.**

(A) Loss-of-function mutants of *RAR1*, *SGT1a* and *SGT1b* were introduced in *siz1-2* by crossing. The double mutants show less cell death than the *siz1* single mutant. *siz1 snc1-11* is included as neg. control (see Fig 2C). Leaves of 5-week-old plants were stained with Trypan blue. To quantify cell death the number of lesions was counted per leaf size area for each genotype. At least 10 images were counted per genotype. Statistical analyses were made using an unpaired two-sided student t-test (grey lines) with ns for  $p > 0.05$ ; \* for  $p \leq 0.05$ ; \*\* for  $p \leq 0.01$  and \*\*\* for  $p \leq 0.001$ .

(B) Introduction of loss-of-function mutants of *RAR1*, *SGT1a* and *SGT1b* in *siz1* hardly rescues the growth retardation of *siz1*. Rosette weight was taken from 5-week-old plants (n = 8).

(JPG)

**S4 Fig. Hypocotyl elongation as part of the skoto- and thermomorphogenesis response is not compromised as a result of SNC1-dependent auto-immunity.** Whereas hypocotyl growth is compromised in *siz1* and *sumo1/2<sup>KD</sup>*, the mutants *cpr1*, *bon1*, and *srfr1-4* show normal hypocotyl elongation at elevated temperature (both in a diurnal cycle and in dark conditions; 28C L and 28C D, respectively). Only *srfr1-4* shows less hypocotyl elongation in dark conditions at 22°C (28C D). Seeds were germinated on plates at 22°C/28°C in SD (L) or dark (D) conditions. Hypocotyl length was measured 5 days post germination. Significant differences were determined using ANOVA followed by Tukey post-hoc test (\*\*\*\*,  $p \leq 0.0001$ ; \*\*\*,  $p \leq 0.001$ ; ns,  $p > 0.05$ ; n = 40–43). All significant differences indicated are in comparison to

Col-0 (control). The result shown was part of the experiment in Fig 4A and 4B. Experiment was repeated two times with similar results. Error bars indicate standard deviation.

(JPG)

**S5 Fig. Growth retardation of *siz1* is partially rescued at 28°C by loss of HY5 function, while COP1 is needed for growth at both 22°C and 28°C.**

(A) Picture of the rosettes of *siz1 hy5-215*, *siz1 cop1-4* and the single mutants. Plants were grown for 5 weeks at 22°C or 28°C (SD). The double mutants adopted a similar morphology as *siz1-2* at 22°C, while the growth retardation of *siz1 hy5-215* partially recovered at 28°C albeit slightly less than *siz1* alone. The rosette of *siz1 cop1-4* remained as compact as *cop1-4* alone without petiole elongation at 28°C, indicative of a compromised thermomorphogenesis response.

(B) Box-plot (middle bar = median, box limit = upper and lower quartile, extremes = Min and Max values) showing the rosette weight of the genotypes depicted in (A). Weight was taken from 5-week-old plants. Significant differences were detected using a two-way ANOVA with Tukey's multiple comparisons test; the letters indicate significantly different groups (n = 8–10). The experiment was repeated twice times with similar result.

(JPG)

**S6 Fig. The expression profile of the genomic targets of PIF4, BZR1, and ARF6 is altered in *siz1 pad4* in response to high temperature.**

(A, B) Scatter plot showing the log<sub>2</sub> fold change in expression of all DEGs (black spots) at the three time points in *siz1 pad4* versus *pad4* (identical to Fig 5C and 5D) for [day 1–0] and [day 4–0], respectively. The black line depicts a Pearson linear regression result on the DEGs with the 95% confidence interval indicated by the grey zone.

(C, D) Similar to (A, B) except that only the DEGs are shown that are also genomic targets for binding of PIF4 (red spots), BZR1 (blue spots) or ARF6 (green spots), *top-to-bottom*. The red, blue and green lines depict the Pearson linear regression analysis on these DEGs that are also genomic targets of these different TFs with the 95% confidence interval indicated by the red, blue or green zone.

(JPG)

**S7 Fig. The expression profile of the genomic targets of PIF4, BZR1 and ARF6 is altered in *sumo1/2KD pad4* in response to high temperature.**

(A, B) Scatter plot showing the log<sub>2</sub> fold change in expression of all DEGs (black spots) at the three time points in *sumo1/2<sup>KD</sup> pad4* versus *pad4* (identical to Fig 5C and 5D) for [day 1–0] and [day 4–0], respectively. The black lines depict a linear Pearson regression analysis on the DEGs with the 95% confidence interval indicated by the grey zone.

(C, D) Similar to (A, B) except that only the DEGs are shown that are also genomic targets for binding of PIF4 (red spots), BZR1 (blue spots) or ARF6 (green spots), *top-to-bottom*. The red, blue and green lines depict a Pearson linear regression analysis on these DEGs that are also genomic targets of PIF4, BZR1 or ARF6, respectively, with the 95% confidence interval indicated by the red, blue or green zone.

(JPG)

**S8 Fig. The expression profile of genomic targets of HY5 and the SAUR genes is altered in *siz1 pad4* in response to high temperature.**

(A, B) Scatter plot showing the log<sub>2</sub> fold change in expression of all DEGs (black spots) at the three time points in *siz1 pad4* versus *pad4* (identical to Fig 5C and 5D) for [day 1–0] and [day 4–0], respectively. The black lines depict a Pearson linear regression analysis of the differentially expressed genes with the 95% confidence interval indicated by the grey zone.

(C, D) Similar to (A, B) except that only the DEGs are shown that are also a genomic target for

binding of HY5 (purple spots). The purple line depicts a Pearson linear regression analysis on these DEGs that are also genomic targets of HY5, with the 95% confidence interval indicated by the purple zone.

(E, F) Similar to (A, B) except that only the DEGs are shown that encode for SAUR genes (yellow spots). These SAUR genes are clearly up-regulated in *pad4* at day 1 and 4, but they fail to respond at day 1 and their response is irregular at 4 day in *siz pad4*. The yellow line depicts a Pearson linear regression analysis on these DEGs that encode SAURs with the 95% confidence interval indicated by the yellow zone.

(JPG)

**S9 Fig. The expression profile of genomic targets of HY5 and SAUR genes is altered in *sumo1/2KD pad4* in response to high temperature.**

(A, B) Scatter plot showing the log<sub>2</sub> fold change in expression of all DEGs (black spots) at the three time points in *sumo1/2<sup>KD</sup> pad4* versus *pad4* (identical to Fig 5C and 5D) for [day 1–0] and [day 4–0], respectively. The black lines depict a Pearson linear regression analysis on the differentially expressed genes with the 95% confidence interval indicated by the grey zone.

(C, D) Similar to (A, B) except that only the DEGs are shown that are also a genomic target for binding of HY5 (purple spots). The purple line depicts a Pearson linear regression analysis on the DEGs that are also genomic targets of HY5, with the 95% confidence interval indicated by the purple zone.

(E, F) Similar to (A, B) except that only the DEGs are shown that encode for SAUR genes (yellow spots). The yellow line depicts a Pearson linear regression analysis on these DEGs that encode SAURs with the 95% confidence interval indicated by the yellow zone.

(JPG)

## Acknowledgments

We would like to thank J. Ham for plant pheno- and genotyping. We are grateful to L. Tikovsky and H. Lemereis for taking care of our plants. We kindly acknowledge M. van Zanten (Utrecht University, Netherlands), J. Parker (MPI Plant Breeding, Cologne), W. Gassmann (University of Missouri, Columbia, MI), Jian Hua (Cornell University, Ithaca, NY), T. Wroblewski (UC Davids, CA) for providing materials. We would like to thank T. Helderma, M. van Hulten and M. Kwaaitaal for assisting with the disease assays.

## Author Contributions

**Conceptualization:** Like Fokkens, Harrold A. van den Burg.

**Data curation:** Like Fokkens, Martijs J. Jonker, Harrold A. van den Burg.

**Formal analysis:** Valentin Hammoudi, Like Fokkens, Martijs J. Jonker, Harrold A. van den Burg.

**Funding acquisition:** Harrold A. van den Burg.

**Investigation:** Valentin Hammoudi, Like Fokkens, Bas Beerens, Georgios Vlachakis, Sayantani Chatterjee, Manuel Arroyo-Mateos, Paul F. K. Wackers, Martijs J. Jonker, Harrold A. van den Burg.

**Methodology:** Valentin Hammoudi, Like Fokkens, Paul F. K. Wackers, Martijs J. Jonker, Harrold A. van den Burg.

**Project administration:** Harrold A. van den Burg.

**Resources:** Harrold A. van den Burg.

**Supervision:** Harrold A. van den Burg.

**Validation:** Bas Beerens, Martijs J. Jonker.

**Visualization:** Like Fokkens, Harrold A. van den Burg.

**Writing – original draft:** Valentin Hammoudi, Harrold A. van den Burg.

**Writing – review & editing:** Like Fokkens, Bas Beerens, Harrold A. van den Burg.

## References

1. Wigge PA (2013) Ambient temperature signalling in plants. *Curr Opin Plant Biol* 16: 661–6. <https://doi.org/10.1016/j.pbi.2013.08.004> PMID: 24021869
2. Hua J (2013) Modulation of plant immunity by light, circadian rhythm, and temperature. *Curr Opin Plant Biol* 16: 406–13. <https://doi.org/10.1016/j.pbi.2013.06.017> PMID: 23856082
3. Whitham S, McCormick S, Baker B (1996) The *N* gene of tobacco confers resistance to tobacco mosaic virus in transgenic tomato. *Proc Natl Acad Sci USA* 93: 8776–81. PMID: 8710948
4. Cheng C, Gao XQ, Feng BM, Sheen J, Shan LB, et al. (2013) Plant immune response to pathogens differs with changing temperatures. *Nat Commun* 4: 2530. <https://doi.org/10.1038/ncomms3530> PMID: 24067909
5. Menna A, Nguyen D, Guttman DS, Desveaux D (2015) Elevated temperature differentially influences effector-triggered immunity outputs in Arabidopsis. *Front Plant Sci* 6: 995. <https://doi.org/10.3389/fpls.2015.00995> PMID: 26617631
6. Wang Y, Bao ZL, Zhu Y, Hua J (2009) Analysis of temperature modulation of plant defense against biotrophic microbes. *Mol Plant Microbe Interact* 22: 498–506. <https://doi.org/10.1094/MPMI-22-5-0498> PMID: 19348568
7. Zhu Y, Qian W, Hua J (2010) Temperature modulates plant defense responses through NB-LRR proteins. *PLoS Pathog* 6: e1000844. <https://doi.org/10.1371/journal.ppat.1000844> PMID: 20368979
8. Erickson FL, Holzberg S, Calderon-Urrea A, Handley V, Axtell M, et al. (1999) The helicase domain of the TMV replicase proteins induces the N-mediated defence response in tobacco. 18: 67–75. PMID: 10341444
9. Heidrich K, Tsuda K, Blanvillain-Baufume S, Wirthmueller L, Bautor J, et al. (2013) Arabidopsis TNL-WRKY domain receptor RRS1 contributes to temperature-conditioned RPS4 auto-immunity. *Front Plant Sci* 4: <https://doi.org/10.3389/fpls.2013.00403> PMID: 24146667
10. Yang S, Hua J (2004) A haplotype-specific resistance gene regulated by BONZAI1 mediates temperature-dependent growth control in Arabidopsis. *Plant Cell* 16: 1060–71. <https://doi.org/10.1105/tpc.020479> PMID: 15031411
11. Cheng YT, Li YZ, Huang SA, Huang Y, Dong XN, et al. (2011) Stability of plant immune-receptor resistance proteins is controlled by SKP1-CULLIN1-F-box (SCF)-mediated protein degradation. *Proc Natl Acad Sci USA* 108: 14694–9. <https://doi.org/10.1073/pnas.1105685108> PMID: 21873230
12. Mang HG, Qian WQ, Zhu Y, Qian J, Kang HG, et al. (2012) Abscisic acid deficiency antagonizes high-temperature inhibition of disease resistance through enhancing nuclear accumulation of resistance proteins SNC1 and RPS4 in Arabidopsis. *Plant Cell* 24: 1271–84. <https://doi.org/10.1105/tpc.112.096198> PMID: 22454454
13. Gou M, Hua J (2012) Complex regulation of an R gene SNC1 revealed by auto-immune mutants. *Plant Signal Behav* 7: 213–6. <https://doi.org/10.4161/psb.18884> PMID: 22415045
14. Li YQ, Yang SH, Yang HJ, Hua J (2007) The TIR-NB-LRR gene SNC1 is regulated at the transcript level by multiple factors. *Mol Plant Microbe Interact* 20: 1449–56. <https://doi.org/10.1094/MPMI-20-11-1449> PMID: 17977156
15. Kim SH, Gao F, Bhattacharjee S, Adiasor JA, Nam JC, et al. (2010) The Arabidopsis resistance-like gene SNC1 is activated by mutations in SRRF1 and contributes to resistance to the bacterial Effector AvrRps4. *PLoS Pathog* 6: e1001172. <https://doi.org/10.1371/journal.ppat.1001172> PMID: 21079790
16. Li YZ, Li SX, Bi DL, Cheng YT, Li X, et al. (2010) SRRF1 negatively regulates plant NB-LRR resistance protein accumulation to prevent autoimmunity. *PLoS Pathog* 6: e1001111. <https://doi.org/10.1371/journal.ppat.1001111> PMID: 20862316

17. Huang S, Monaghan J, Zhong XH, Lin L, Sun TJ, et al. (2014) HSP90s are required for NLR immune receptor accumulation in Arabidopsis. *Plant J* 79: 427–39. <https://doi.org/10.1111/tpj.12573> PMID: 24889324
18. Gou MY, Shi ZY, Zhu Y, Bao ZL, Wang GY, et al. (2012) The F-box protein CPR1/CPR30 negatively regulates R protein SNC1 accumulation. *Plant J* 69: 411–20. <https://doi.org/10.1111/j.1365-313X.2011.04799.x> PMID: 21967323
19. Zhang YL, Goritschnig S, Dong XN, Li X (2003) A gain-of-function mutation in a plant disease resistance gene leads to constitutive activation of downstream signal transduction pathways in *suppressor of npr1-1, constitutive 1*. *Plant Cell* 15: 2636–46. <https://doi.org/10.1105/tpc.015842> PMID: 14576290
20. Garcia AV, Blanvillain-Baufume S, Huibers RP, Wiermer M, Li G, et al. (2010) Balanced nuclear and cytoplasmic activities of EDS1 are required for a complete plant innate immune response. *PLoS Pathog* 6: e1000970. <https://doi.org/10.1371/journal.ppat.1000970> PMID: 20617163
21. Wiermer M, Feys BJ, Parker JE (2005) Plant immunity: the EDS1 regulatory node. *Curr Opin Plant Biol* 8: 383–9. <https://doi.org/10.1016/j.pbi.2005.05.010> PMID: 15939664
22. Heidrich K, Wirthmueller L, Tasset C, Pouzet C, Deslandes L, et al. (2011) Arabidopsis EDS1 connects pathogen effector recognition to cell compartment-specific immune responses. *Science* 334: 1401–4. <https://doi.org/10.1126/science.1211641> PMID: 22158818
23. Wagner S, Stuttmann J, Rietz S, Guerois R, Brunstein E, et al. (2013) Structural basis for signaling by exclusive EDS1 heteromeric complexes with SAG101 or PAD4 in plant innate immunity. *Cell Host Microbe* 14: 619–30. <https://doi.org/10.1016/j.chom.2013.11.006> PMID: 24331460
24. Gangappa SN, Berriri S, Kumar SV (2017) PIF4 coordinates thermosensory growth and immunity in Arabidopsis. *Curr Biol* 27: 243–9. <https://doi.org/10.1016/j.cub.2016.11.012> PMID: 28041792
25. Quint M, Delker C, Franklin KA, Wigge PA, Halliday KJ, et al. (2016) Molecular and genetic control of plant thermomorphogenesis. *Nat Plants* 2: 15190. <https://doi.org/10.1038/nplants.2015.190> PMID: 27250752
26. Hoecker U (2017) The activities of the E3 ubiquitin ligase COP1/SPA, a key repressor in light signaling. *Curr Opin Plant Biol* 37: 63–9. <https://doi.org/10.1016/j.pbi.2017.03.015> PMID: 28433946
27. Park YJ, Lee HJ, Ha JH, Kim JY, Park CM (2017) COP1 conveys warm temperature information to hypocotyl thermomorphogenesis. *215*: 269–80. <https://doi.org/10.1111/nph.14581> PMID: 28418582
28. Lee J, Nam J, Park HC, Na G, Miura K, et al. (2007) Salicylic acid-mediated innate immunity in Arabidopsis is regulated by SIZ1 SUMO E3 ligase. *Plant J* 49: 79–90. <https://doi.org/10.1111/j.1365-313X.2006.02947.x> PMID: 17163880
29. Van den Burg HA, Kini RK, Schuurink RC, Takken FLW (2010) Arabidopsis Small Ubiquitin-like Modifier paralogs have distinct functions in development and defense. *Plant Cell* 22: 1998–2016. <https://doi.org/10.1105/tpc.109.070961> PMID: 20525853
30. Cheong MS, Park HC, Hong MJ, Lee J, Choi W, et al. (2009) Specific domain structures control abscisic acid-, salicylic acid-, and stress-mediated SIZ1 phenotypes. *Plant Physiol* 151: 1930–42. <https://doi.org/10.1104/pp.109.143719> PMID: 19837819
31. Conti L, Nelis S, Zhang CJ, Woodcock A, Swarup R, et al. (2014) Small Ubiquitin-like Modifier protein SUMO enables plants to control growth independently of the phytohormone Gibberellin. *Dev Cell* 28: 102–10. <https://doi.org/10.1016/j.devcel.2013.12.004> PMID: 24434138
32. Sadanandom A, Adam E, Orosa B, Viczian A, Klose C, et al. (2015) SUMOylation of phytochrome-B negatively regulates light-induced signaling in *Arabidopsis thaliana*. *Proc Natl Acad Sci USA* 112: 11108–13. <https://doi.org/10.1073/pnas.1415260112> PMID: 26283376
33. Crozet P, Margalha L, Butowt R, Fernandes N, Elias CA, et al. (2016) SUMOylation represses SnRK1 signaling in Arabidopsis. *Plant J* 85: 120–33. <https://doi.org/10.1111/tpj.13096> PMID: 26662259
34. Kim JY, Jang IC, Seo HS (2016) COP1 controls abiotic stress responses by modulating AtSIZ1 function through its E3 Ubiquitin ligase activity. *Front Plant Sci* 7: 1182. <https://doi.org/10.3389/fpls.2016.01182> PMID: 27536318
35. Lin XL, Niu D, Hu ZL, Kim DH, Jin YH, et al. (2016) An Arabidopsis SUMO E3 ligase, SIZ1, negatively regulates photomorphogenesis by promoting COP1 activity. *PLoS Genet* 12: e1006016. <https://doi.org/10.1371/journal.pgen.1006016> PMID: 27128446
36. Jirage D, Zhou N, Cooper B, Clarke JD, Dong XN, et al. (2001) Constitutive salicylic acid-dependent signaling in *cpr1* and *cpr6* mutants requires PAD4. *Plant J* 26: 395–407. PMID: 11439127
37. Bhattacharjee S, Halane MK, Kim SH, Gassmann W (2011) Pathogen effectors target Arabidopsis EDS1 and alter its interactions with immune regulators. *334*: 1405–8. <https://doi.org/10.1126/science.1211592> PMID: 22158819
38. Stuttmann J, Peine N, Garcia AV, Wagner C, Choudhury SR, et al. (2016) Arabidopsis thaliana DM2h (R8) within the Landsberg RPP1-like Resistance Locus Underlies Three Different Cases of EDS1-Conditioned Autoimmunity. *12*: e1005990. <https://doi.org/10.1371/journal.pgen.1005990> PMID: 27082651

39. Ishida T, Yoshimura M, Miura K, Sugimoto K (2012) MMS21/HPY2 and SIZ1, two Arabidopsis SUMO E3 ligases, have distinct functions in development. *PLoS One* 7: e46897. <https://doi.org/10.1371/journal.pone.0046897> PMID: 23056518
40. Wildermuth MC, Dewdney J, Wu G, Ausubel FM (2001) Isochorismate synthase is required to synthesize salicylic acid for plant defence. *Nature* 414: 562–5. <https://doi.org/10.1038/35107108> PMID: 11734859
41. Brodersen P, Malinovsky FG, Hematy K, Newman MA, Mundy J (2005) The role of salicylic acid in the induction of cell death in Arabidopsis acd11. *Plant Physiol* 138: 1037–45. <https://doi.org/10.1104/pp.105.059303> PMID: 15923330
42. Stokes TL, Kunkel BN, Richards EJ (2002) Epigenetic variation in Arabidopsis disease resistance. *Genes Dev* 16: 171–82. <https://doi.org/10.1101/gad.952102> PMID: 11799061
43. Miller MJ, Barrett-Wilt GA, Hua Z, Vierstra RD (2010) Proteomic analyses identify a diverse array of nuclear processes affected by small ubiquitin-like modifier conjugation in Arabidopsis. *Proc Natl Acad Sci USA* 107: 16512–7. <https://doi.org/10.1073/pnas.1004181107> PMID: 20813957
44. Miller MJ, Scalf M, Rytz TC, Hubler SL, Smith LM, et al. (2013) Quantitative proteomics reveals factors regulating RNA biology as dynamic targets of stress-induced SUMOylation in Arabidopsis. *Mol Cell Proteomics* 12: 449–63. <https://doi.org/10.1074/mcp.M112.025056> PMID: 23197790
45. McNellis TW, von Arnim AG, Araki T, Komeda Y, Misera S, et al. (1994) Genetic and molecular analysis of an allelic series of cop1 mutants suggests functional roles for the multiple protein domains. *Plant Cell* 6: 487–500. <https://doi.org/10.1105/tpc.6.4.487> PMID: 8205001
46. Stavang JA, Gallego-Bartolome J, Gomez MD, Yoshida S, Asami T, et al. (2009) Hormonal regulation of temperature-induced growth in Arabidopsis. *Plant J* 60: 589–601. <https://doi.org/10.1111/j.1365-313X.2009.03983.x> PMID: 19686536
47. Fu X, Richards DE, Fleck B, Xie D, Burton N, et al. (2004) The Arabidopsis mutant *sleepy1 gar2-1* protein promotes plant growth by increasing the affinity of the SCFSLY1 E3 ubiquitin ligase for DELLA protein substrates. *Plant Cell* 16: 1406–18. <https://doi.org/10.1105/tpc.021386> PMID: 15161962
48. Li QF, Wang C, Jiang L, Li S, Sun SS, et al. (2012) An interaction between BZR1 and DELLAs mediates direct signaling crosstalk between brassinosteroids and gibberellins in Arabidopsis. *Sci Signal* 5: ra72. <https://doi.org/10.1126/scisignal.2002908> PMID: 23033541
49. Li K, Yu R, Fan LM, Wei N, Chen H, et al. (2016) DELLA-mediated PIF degradation contributes to coordination of light and gibberellin signalling in Arabidopsis. *Nat Commun* 7: 11868. <https://doi.org/10.1038/ncomms11868> PMID: 27282989
50. Catala R, Ouyang J, Abreu IA, Hu Y, Seo H, et al. (2007) The Arabidopsis E3 SUMO ligase SIZ1 regulates plant growth and drought responses. *Plant Cell* 19: 2952–66. <https://doi.org/10.1105/tpc.106.049981> PMID: 17905899
51. Choe S, Fujioka S, Noguchi T, Takatsuto S, Yoshida S, et al. (2001) Overexpression of DWARF4 in the brassinosteroid biosynthetic pathway results in increased vegetative growth and seed yield in Arabidopsis. *Plant J* 26: 573–82. PMID: 11489171
52. Choe SW, Dilkes BP, Fujioka S, Takatsuto S, Sakurai A, et al. (1998) The *DWF4* gene of Arabidopsis encodes a cytochrome P450 that mediates multiple 22 alpha-hydroxylation steps in brassinosteroid biosynthesis. *Plant Cell* 10: 231–43. PMID: 9490746
53. Chung Y, Choe S (2013) The regulation of Brassinosteroid biosynthesis in Arabidopsis. *Crit Rev Plant Sci* 32: 396–410.
54. Friedrichsen DM, Nemhauser J, Muramitsu T, Maloof JN, Alonso J, et al. (2002) Three redundant brassinosteroid early response genes encode putative bHLH transcription factors required for normal growth. *Genetics* 162: 1445–56. PMID: 12454087
55. Guo ZX, Fujioka S, Blancaflor EB, Miao S, Gou XP, et al. (2010) TCP1 modulates Brassinosteroid biosynthesis by regulating the expression of the key biosynthetic Gene *DWARF4* in *Arabidopsis thaliana*. *Plant Cell* 22: 1161–73. <https://doi.org/10.1105/tpc.109.069203> PMID: 20435901
56. Oh E, Zhu JY, Bai MY, Arenhart RA, Sun Y, et al. (2014) Cell elongation is regulated through a central circuit of interacting transcription factors in the Arabidopsis hypocotyl. *Elife* 3: e03031. <https://doi.org/10.7554/eLife.03031> PMID: 24867218
57. Oh E, Zhu JY, Wang ZY (2012) Interaction between BZR1 and PIF4 integrates brassinosteroid and environmental responses. *Nat Cell Biol* 14: 802–U64. <https://doi.org/10.1038/ncb2545> PMID: 22820378
58. Gangappa SN, Kumar SV (2017) DET1 and HY5 control PIF4-mediated thermosensory elongation growth through distinct mechanisms. *Cell Rep* 18: 344–51. <https://doi.org/10.1016/j.celrep.2016.12.046> PMID: 28076780



59. Toledo-Ortiz G, Johansson H, Lee KP, Bou-Torrent J, Stewart K, et al. (2014) The HY5-PIF regulatory module coordinates light and temperature control of photosynthetic gene transcription. *PLoS Genet* 10: <https://doi.org/10.1371/journal.pgen.1004416> PMID: 24922306
60. Franklin KA, Lee SH, Patel D, Kumar SV, Spartz AK, et al. (2011) Phytochrome-interacting factor 4 (PIF4) regulates auxin biosynthesis at high temperature. *Proc Natl Acad Sci USA* 108: 20231–5. <https://doi.org/10.1073/pnas.1110682108> PMID: 22123947
61. Miura K, Lee J, Miura T, Hasegawa PM (2010) SIZ1 controls cell growth and plant development in Arabidopsis through salicylic acid. *Plant Cell Physiol* 51: 103–13. <https://doi.org/10.1093/pcp/pcp171> PMID: 20007967
62. Zhu Z, Xu F, Zhang Y, Cheng YT, Wiermer M, et al. (2010) Arabidopsis resistance protein SNC1 activates immune responses through association with a transcriptional corepressor. *Proc Natl Acad Sci U S A* 107: 13960–5. <https://doi.org/10.1073/pnas.1002828107> PMID: 20647385
63. Yang S, Yang H, Grisafi P, Sanchatjate S, Fink GR, et al. (2006) The BON/CPN gene family represses cell death and promotes cell growth in Arabidopsis. *Plant J* 45: 166–79. <https://doi.org/10.1111/j.1365-3113X.2005.02585.x> PMID: 16367962
64. Huq E, Quail PH (2002) PIF4, a phytochrome-interacting bHLH factor, functions as a negative regulator of phytochrome B signaling in Arabidopsis. *EMBO J* 21: 2441–50. <https://doi.org/10.1093/emboj/21.10.2441> PMID: 12006496
65. Koini MA, Alvey L, Allen T, Tilley CA, Harberd NP, et al. (2009) High temperature-mediated adaptations in plant architecture require the bHLH transcription factor PIF4. *Curr Biol* 19: 408–13. <https://doi.org/10.1016/j.cub.2009.01.046> PMID: 19249207
66. Nieto C, Lopez-Salmeron V, Daviere JM, Prat S (2015) ELF3-PIF4 interaction regulates plant growth independently of the Evening Complex. *Curr Biol* 25: 187–93. <https://doi.org/10.1016/j.cub.2014.10.070> PMID: 25557667
67. Tan CM, Li MY, Yang PY, Chang SH, Ho YP, et al. (2015) Arabidopsis HFR1 is a potential nuclear substrate regulated by the *Xanthomonas* type III effector XopD(Xcc8004). *PLoS ONE* 10: e0117067. <https://doi.org/10.1371/journal.pone.0117067> PMID: 25647296
68. Ballesteros ML, Bolle C, Lois LM, Moore JM, Vielle-Calzada JP, et al. (2001) LAF1, a MYB transcription activator for phytochrome A signaling. *Genes Dev* 15: 2613–25. <https://doi.org/10.1101/gad.915001> PMID: 11581165
69. Mazur MJ, Spears BJ, Djajasaputra A, van der Gragt M, Vlachakis G, et al. (2017) Arabidopsis TCP transcription factors interact with the SUMO conjugating machinery in nuclear foci 8: 2043. <https://doi.org/10.3389/fpls.2017.02043> PMID: 29250092
70. Khan M, Rozhon W, Unterholzner SJ, Chen T, Eremina M, et al. (2014) Interplay between phosphorylation and SUMOylation events determines CESTA protein fate in brassinosteroid signalling. *Nat Commun* 5: 4687. <https://doi.org/10.1038/ncomms5687> PMID: 25134617
71. Miura K, Rus A, Sharkhuu A, Yokoi S, Karthikeyan AS, et al. (2005) The Arabidopsis SUMO E3 ligase SIZ1 controls phosphate deficiency responses. *Proc Natl Acad Sci USA* 102: 7760–5. <https://doi.org/10.1073/pnas.0500778102> PMID: 15894620
72. Oyama T, Shimura Y, Okada K (1997) The Arabidopsis HY5 gene encodes a bZIP protein that regulates stimulus-induced development of root and hypocotyl. *Gene Dev* 11: 2983–95. PMID: 9367981
73. Glazebrook J, Zook M, Mert F, Kagan I, Rogers EE, et al. (1997) Phytoalexin-deficient mutants of Arabidopsis reveal that PAD4 encodes a regulatory factor and that four PAD genes contribute to downy mildew resistance. *Genetics* 146: 381–92. PMID: 9136026
74. Bartsch M, Gobbato E, Bednarek P, Debey S, Schultze JL, et al. (2006) Salicylic acid-independent ENHANCED DISEASE SUSCEPTIBILITY1 signaling in Arabidopsis immunity and cell death is regulated by the monooxygenase FMO1 and the nudix hydrolase NUDT7. *Plant Cell* 18: 1038–51. <https://doi.org/10.1105/tpc.105.039982> PMID: 16531493
75. Delaney TP, Uknes S, Vernooij B, Friedrich L, Weymann K, et al. (1994) A central role of salicylic-acid in plant-disease resistance. *Science* 266: 1247–50. <https://doi.org/10.1126/science.266.5188.1247> PMID: 17810266
76. Gray WM, Muskett PR, Chuang HW, Parker JE (2003) Arabidopsis SGT1b is required for SCF(TIR1)-mediated auxin response. *Plant Cell* 15: 1310–9. <https://doi.org/10.1105/tpc.010884> PMID: 12782725
77. Tomero P, Merritt P, Sadanandom A, Shirasu K, Innes RW, et al. (2002) RAR1 and NDR1 contribute quantitatively to disease resistance in Arabidopsis, and their relative contributions are dependent on the R gene assayed. *Plant Cell* 14: 1005–15. <https://doi.org/10.1105/tpc.001032> PMID: 12034893
78. Leivar P, Monte E, Al-Sady B, Carle C, Storer A, et al. (2008) The Arabidopsis phytochrome-interacting factor PIF7, together with PIF3 and PIF4, regulates responses to prolonged red light by modulating phyB levels. *Plant Cell* 20: 337–52. <https://doi.org/10.1105/tpc.107.052142> PMID: 18252845

79. Hammoudi V, Vlachakis G, de Jonge R, Breit TM, van den Burg HA (2017) Genetic characterization of T-DNA insertions in the genome of the *Arabidopsis thaliana sumo1/2* knock-down line. *Plant Signal Behav* 12: e1293216. <https://doi.org/10.1080/15592324.2017.1293216> PMID: 28267405
80. March-Diaz R, Garcia-Dominguez M, Lozano-Juste J, Leon J, Florencio FJ, et al. (2008) Histone H2A.Z and homologues of components of the SWR1 complex are required to control immunity in *Arabidopsis*. *Plant J* 53: 475–87. <https://doi.org/10.1111/j.1365-313X.2007.03361.x> PMID: 17988222
81. Cuppels DA (1986) Generation and Characterization of Tn5 Insertion mutations in *Pseudomonas-syringae pv tomato*. *Appl Environ Microb* 51: 323–7. PMID: 16346988
82. King EO, Ward MK, Raney DE (1954) Two simple media for the demonstration of pyocyanin and fluorescin. *J Lab Clin Med* 44: 301–7. PMID: 13184240
83. van Wees S (2008) Phenotypic analysis of *Arabidopsis* mutants: trypan blue stain for fungi, oomycetes, and dead plant cells. *CSH Protoc* 2008: pdb prot4982. PMID: 21356882
84. Irizarry RA, Hobbs B, Collin F, Beazer-Barclay YD, Antonellis KJ, et al. (2003) Exploration, normalization, and summaries of high density oligonucleotide array probe level data. *Biostatistics* 4: 249–64. <https://doi.org/10.1093/biostatistics/4.2.249> PMID: 12925520
85. Smyth GK (2004) Linear models and empirical bayes methods for assessing differential expression in microarray experiments. *Stat Appl Genet Mol Biol* 3: Article3. <https://doi.org/10.2202/1544-6115.1027> PMID: 16646809
86. Storey JD, Tibshirani R (2003) Statistical significance for genomewide studies. *Proc Natl Acad Sci USA* 100: 9440–5. <https://doi.org/10.1073/pnas.1530509100> PMID: 12883005
